# Supplementary material
Source: PubMed Central journal article supplement (PMC7530638)
Supplement: NIHMS1580785-supplement-Appendix.pdf [file NIHMS1580785-supplement-Appendix.pdf]

**APPENDIX**

|                                                                                                                                                                         |    |
|-------------------------------------------------------------------------------------------------------------------------------------------------------------------------|----|
| Appendix 1. Matching Algorithm.....                                                                                                                                     | 2  |
| Appendix 2. Risk Model for Defining Probability of 30-day Death.....                                                                                                    | 4  |
| Appendix 2a. General Surgery Probability of Death Model.....                                                                                                            | 4  |
| Appendix 2b. Orthopedic Surgery Probability of Death Model.....                                                                                                         | 6  |
| Appendix 2c. Vascular Surgery Probability of Death Model.....                                                                                                           | 7  |
| Appendix 3. Complication Set for 30-day Complications and Failure to Rescue.....                                                                                        | 9  |
| Appendix 4. Definitions of Resource Utilization-based Costs and Method of Cost Adjustment for Differences in Nurse Staffing and Skill Mix.....                          | 13 |
| Appendix 5. Correlation and Principal Component Analysis of Nursing Resource Measures.....                                                                              | 16 |
| Appendix 6. Definitions of Principal Procedures.....                                                                                                                    | 17 |
| Appendix 6a. General Surgery.....                                                                                                                                       | 17 |
| Appendix 6b. Orthopedic Surgery.....                                                                                                                                    | 19 |
| Appendix 6c. Vascular Surgery.....                                                                                                                                      | 22 |
| Appendix 7. Complete Matching Results with All Variables.....                                                                                                           | 24 |
| Appendix 8. Differences in 30-day Mortality after Post-Match Adjustment for Hospital Bed Size and Resident to Bed Ratio.....                                            | 38 |
| Appendix 9. Differences in Outcomes after Post-Match Adjustment for State.....                                                                                          | 39 |
| Appendix 10. 30-day Costs under Different Definitions.....                                                                                                              | 40 |
| Appendix 11. 30-day Mortality and Cost Differences Among Matched Patients in Top 15%, Middle 40%, and Bottom 45% of Hospitals.....                                      | 41 |
| Appendix 12. Appendix 12. Differences in Hospital Coherence Percentiles among Matched Pairs: Middle Hospitals are Closer to Top Hospitals than to Bottom Hospitals..... | 42 |
| Appendix 13. 30-day Mortality Differences Between Matched Patients in Better and Worse Nursing Resourced Hospitals for Common Procedures.....                           | 43 |
| APPENDIX REFERENCES.....                                                                                                                                                | 44 |

**Appendix 1. Matching Algorithm**

1. Match exactly for the following variables
  - a. ICD-9-CM principal procedures (see eTable2 in the Supplement for complete list)
  - b. Hospital size category
    - i. Small (< 250 beds)
    - ii. Large ( $\geq$  250 beds)
  - c. Hospital teaching status category
    - i. Non-teaching ( $0 \leq$  medical residents to beds < 0.05)
    - ii. Minor teaching ( $0.05 \leq$  medical residents to beds < 0.25)
    - iii. Major teaching (medical residents to beds  $\geq$  0.25)
  - d. Hospital technology status category
    - i. High technology (capacity to perform coronary artery bypass surgery and/or organ transplantation)
    - ii. Low technology
  - e. Quintiles of risk of 30-day mortality
2. Minimize the Mahalanobis Distance between cases and controls for the following variables
  - a. Age category at admission (years)
  - b. Sex
  - c. Race (% non-Hispanic white)
  - d. Race (% Black)
  - e. Race (% Hispanic)
  - f. Race (% other)
  - g. Emergent admission
  - h. Transfer-in status
  - i. Transfer-in from another hospital's emergency department
  - j. Secondary procedures
  - k. Propensity score for attending a focal (case) hospital
  - l. Comorbidities:
    - i. Congestive heart failure
    - ii. Past myocardial infarction
    - iii. Past arrhythmia
    - iv. Angina
    - v. Valvular disease
    - vi. Unstable angina
    - vii. Hypertension
    - viii. Diabetes
    - ix. Renal dysfunction
    - x. Renal failure
    - xi. Liver disease
    - xii. Cancer
    - xiii. Specific abdominal cancer
    - xiv. Chronic obstructive pulmonary disease
    - xv. Asthma
    - xvi. Post-inflammatory pulmonary fibrosis
    - xvii. Dementia
    - xviii. Stroke
    - xix. Seizure
    - xx. Paraplegia
    - xxi. Hypothyroidism
    - xxii. Collagen vascular disease
    - xxiii. Acquired immunodeficiency syndrome (AIDS)
    - xxiv. Chronic peptic ulcer disease
    - xxv. Congenital coagulopathy / hemophilia
    - xxvi. Coagulopathy
    - xxvii. Cushing's disease
    - xxviii. Grave's disease

- xxix. Hemoglobinopathy
- xxx. Weight loss/malnutrition
- 3. Near Fine Balance was used on the following variables:
  - a. Race (% non-Hispanic white)
  - b. Race (% Black)
  - c. Race (% Hispanic)
  - d. Race (% other)
  - e. Emergency admission
  - f. Comorbidities
    - i. Congestive heart failure
    - ii. Past myocardial infarction
    - iii. Past arrhythmia
    - iv. Angina
    - v. Valvular disease
    - vi. Unstable angina
    - vii. Hypertension
    - viii. Diabetes
    - ix. Renal dysfunction
    - x. Renal failure
    - xi. Liver disease
    - xii. Cancer
    - xiii. Specific abdominal cancer
    - xiv. Chronic obstructive pulmonary disease
    - xv. Asthma
    - xvi. Post-inflammatory pulmonary fibrosis
    - xvii. Dementia
    - xviii. Stroke
    - xix. Seizure
    - xx. Paraplegia
    - xxi. Congenital coagulopathy / hemophilia
    - xxii. Weight loss/malnutrition
  - g. Hospital Size;
    - i. 250-499 beds
    - ii. >500 beds
- 4. Penalties were used on:
  - a. Probability of 30-day death
  - b. Probability of intensive or intermediate care unit admission
  - c. Predicted length of stay
  - d. Predicted 30-day costs
  - e. Continuous measure of hospital resident-to-bed ratio
  - f. Continuous measure of hospital number of beds
- 5. Calipers were placed the propensity score for admission to a focal hospital.

**Appendix 2. Risk Model for Defining Probability of 30-day Death**

To balance case and control patients on their risk profile, logistic regression models were used to predict each patient's 30-day risk of death. For each surgical group (i.e., general surgery, orthopedic surgery, and vascular surgery), a model was fit to an external dataset of Medicare claims. The external dataset was created by taking a 10% random sample of Medicare patients in California, Florida, New Jersey, and Pennsylvania for the years 2013-2015. Patients in this external dataset were not used for matching. Coefficients for each of the variables were then applied to patients in the matching dataset to assign each patient's risk of 30-day death. The resulting risk scores were then used as a matching variable and to stratify matched pairs by quintiles of 30-day mortality risk.

**Appendix 2a. General Surgery Probability of Death Model.**

| Variable                                                 | Estimate (SE) | Odds (95% CI)     | Chi Sq | P      |
|----------------------------------------------------------|---------------|-------------------|--------|--------|
| Model Intercept                                          | -4.25 (0.31)  | 0.00 (0.00, 0.00) | 184.71 | <.0001 |
| Age category (65-69) (reference)                         | --            | --                | --     | --     |
| Age category (70-74 years)                               | -0.22 (0.22)  | 0.80 (0.53, 1.23) | 1.04   | 0.3085 |
| Age category (75-79 years)                               | 0.04 (0.20)   | 1.04 (0.70, 1.55) | 0.04   | 0.8400 |
| Age category (80-84 years)                               | 0.50 (0.20)   | 1.65 (1.12, 2.42) | 6.32   | 0.0119 |
| Age category (85+ years)                                 | 1.05 (0.19)   | 2.85 (1.98, 4.11) | 31.34  | <.0001 |
| Sex (male)                                               | 0.12 (0.12)   | 1.12 (0.90, 1.41) | 1.00   | 0.3166 |
| Emergency admission                                      | 0.69 (0.13)   | 2.00 (1.55, 2.58) | 28.05  | <.0001 |
| Transfer-in from another hospital's emergency department | 0.42 (0.36)   | 1.53 (0.76, 3.07) | 1.43   | 0.2316 |
| Transfer-in status                                       | -0.39 (0.51)  | 0.68 (0.25, 1.85) | 0.58   | 0.4468 |
| Major Secondary Procedure                                | 0.35 (0.13)   | 1.43 (1.12, 1.82) | 8.00   | 0.0047 |
| Comorbidities                                            |               |                   |        |        |
| CHF                                                      | 0.41 (0.13)   | 1.50 (1.17, 1.93) | 10.07  | 0.0015 |
| Stroke                                                   | -0.23 (0.16)  | 0.80 (0.59, 1.08) | 2.16   | 0.1413 |
| Seizure                                                  | 0.43 (0.27)   | 1.54 (0.91, 2.60) | 2.54   | 0.1109 |
| Dementia                                                 | 0.43 (0.13)   | 1.53 (1.18, 1.99) | 10.24  | 0.0014 |
| Past Myocardial Infarction                               | -0.07 (0.17)  | 0.93 (0.67, 1.30) | 0.16   | 0.6882 |
| Past Arrhythmia                                          | 0.02 (0.12)   | 1.02 (0.81, 1.29) | 0.02   | 0.8753 |
| Unstable Angina                                          | 0.30 (0.30)   | 1.35 (0.75, 2.43) | 0.98   | 0.3234 |
| Angina                                                   | 0.13 (0.21)   | 1.13 (0.75, 1.72) | 0.36   | 0.5505 |
| Hypertension                                             | -0.43 (0.19)  | 0.65 (0.45, 0.94) | 5.23   | 0.0222 |
| Valvular Disease                                         | 0.23 (0.12)   | 1.26 (1.00, 1.59) | 3.86   | 0.0495 |
| Chronic Lung Disease                                     | 0.38 (0.12)   | 1.47 (1.17, 1.84) | 10.97  | 0.0009 |
| Asthma                                                   | -0.15 (0.18)  | 0.86 (0.61, 1.22) | 0.71   | 0.4004 |
| Liver Disease                                            | 0.08 (0.14)   | 1.08 (0.82, 1.43) | 0.33   | 0.5679 |
| Renal Dysfunction                                        | 0.85 (0.12)   | 2.33 (1.84, 2.95) | 48.92  | <.0001 |
| Renal Failure                                            | 0.78 (0.16)   | 2.17 (1.58, 2.99) | 23.08  | <.0001 |
| Diabetes                                                 | -0.05 (0.12)  | 0.95 (0.75, 1.19) | 0.21   | 0.6431 |
| Paraplegia                                               | 0.43 (0.28)   | 1.54 (0.89, 2.65) | 2.41   | 0.1209 |
| Collagen Vascular Disease                                | 0.18 (0.19)   | 1.19 (0.83, 1.72) | 0.89   | 0.3444 |
| Coagulopathy                                             | 0.33 (0.47)   | 1.39 (0.56, 3.46) | 0.49   | 0.4832 |
| Thrombocytopenia                                         | -0.03 (0.24)  | 0.97 (0.60, 1.55) | 0.02   | 0.8947 |
| Other Coagulopathy                                       | 0.59 (0.18)   | 1.80 (1.28, 2.55) | 11.10  | 0.0009 |
| Post-Inflammatory Pulmonary Fibrosis                     | 0.15 (0.23)   | 1.17 (0.74, 1.84) | 0.45   | 0.5044 |
| Cancer                                                   | -0.19 (0.12)  | 0.83 (0.66, 1.05) | 2.36   | 0.1249 |
| Abdominal Cancer                                         | 0.76 (0.27)   | 2.14 (1.27, 3.60) | 8.14   | 0.0043 |
| Hypothyroidism                                           | 0.04 (0.12)   | 1.04 (0.82, 1.32) | 0.12   | 0.7263 |
| Weight loss                                              | 0.39 (0.12)   | 1.48 (1.18, 1.86) | 11.27  | 0.0008 |
| Principal Procedures                                     |               |                   |        |        |
| Open and other right hemicolectomy (Reference)           | --            | --                | --     | --     |
| Laparoscopic sigmoidectomy                               | -1.00 (0.62)  | 0.37 (0.11, 1.23) | 2.64   | 0.1042 |
| Total splenectomy                                        | 0.58 (0.55)   | 1.78 (0.61, 5.24) | 1.10   | 0.2952 |
| Suture of duodenal ulcer site                            | 1.17 (0.37)   | 3.22 (1.56, 6.66) | 10.01  | 0.0016 |
| Open and other resection of transverse colon             | 0.89 (0.45)   | 2.44 (1.01, 5.89) | 3.92   | 0.0477 |

| Variable                                   | Estimate (SE) | Odds (95% CI)      | Chi Sq | P      |
|--------------------------------------------|---------------|--------------------|--------|--------|
| Open and other left hemicolectomy          | 0.55 (0.30)   | 1.73 (0.97, 3.09)  | 3.40   | 0.0650 |
| Open and other sigmoidectomy               | 0.50 (0.24)   | 1.64 (1.03, 2.63)  | 4.27   | 0.0389 |
| Exteriorization of large intestine         | 0.07 (0.53)   | 1.07 (0.38, 3.01)  | 0.02   | 0.9013 |
| Laparoscopic appendectomy                  | -2.05 (0.74)  | 0.13 (0.03, 0.55)  | 7.65   | 0.0057 |
| Other appendectomy                         | -2.00 (1.04)  | 0.14 (0.02, 1.04)  | 3.69   | 0.0546 |
| Laparoscopic cholecystectomy (5123)        | -1.66 (0.28)  | 0.19 (0.11, 0.33)  | 35.81  | <.0001 |
| Incisional hernia repair                   | -0.42 (0.76)  | 0.65 (0.15, 2.88)  | 0.31   | 0.5751 |
| Laparoscopic lysis of peritoneal adhesions | -1.24 (0.64)  | 0.29 (0.08, 1.02)  | 3.73   | 0.0533 |
| Other lysis of peritoneal adhesions        | 0.24 (0.25)   | 1.27 (0.78, 2.08)  | 0.94   | 0.3333 |
| Other abdominal hernia procedures          | -0.58 (0.33)  | 0.56 (0.29, 1.07)  | 3.10   | 0.0783 |
| Anterior rectal procedures                 | -0.40 (0.41)  | 0.67 (0.30, 1.49)  | 0.95   | 0.3285 |
| Bowel anastomoses                          | -0.58 (0.76)  | 0.56 (0.13, 2.50)  | 0.58   | 0.4479 |
| Bowel procedures, other                    | -0.32 (0.52)  | 0.73 (0.26, 2.02)  | 0.37   | 0.5426 |
| Other breast procedures                    | -1.92 (1.02)  | 0.15 (0.02, 1.09)  | 3.53   | 0.0602 |
| Colostomy                                  | -1.40 (0.79)  | 0.25 (0.05, 1.16)  | 3.14   | 0.0765 |
| Femoral hernia repair                      | 0.30 (0.50)   | 1.34 (0.51, 3.55)  | 0.35   | 0.5522 |
| Gallbladder procedures, other              | -1.10 (0.38)  | 0.33 (0.16, 0.70)  | 8.56   | 0.0034 |
| Gastrectomy with anastomosis               | -0.43 (0.57)  | 0.65 (0.21, 1.99)  | 0.57   | 0.4511 |
| Gastrectomy, other                         | 0.36 (0.46)   | 1.44 (0.59, 3.53)  | 0.62   | 0.4293 |
| Gastric bypass                             | 0.04 (0.58)   | 1.04 (0.33, 3.27)  | 0.00   | 0.9446 |
| Other laparoscopic colon procedures        | -1.22 (1.05)  | 0.29 (0.04, 2.30)  | 1.36   | 0.2432 |
| Laparoscopic hemicolectomy                 | -0.31 (0.32)  | 0.73 (0.39, 1.38)  | 0.95   | 0.3301 |
| Inguinal hernia repair                     | -1.01 (0.37)  | 0.37 (0.18, 0.75)  | 7.45   | 0.0063 |
| Liver procedures                           | -0.29 (0.65)  | 0.75 (0.21, 2.69)  | 0.20   | 0.6551 |
| Other open colon procedures                | 0.96 (0.35)   | 2.61 (1.33, 5.14)  | 7.70   | 0.0055 |
| Ostomy closure                             | -2.02 (1.04)  | 0.13 (0.02, 1.02)  | 3.77   | 0.0523 |
| Ostomy procedures, other                   | 1.57 (0.39)   | 4.83 (2.25, 10.35) | 16.38  | <.0001 |
| Pancreatic procedures, other               | -1.12 (1.05)  | 0.33 (0.04, 2.57)  | 1.13   | 0.2877 |
| Proctopexy for fistula repair              | -0.10 (0.65)  | 0.90 (0.25, 3.23)  | 0.03   | 0.8738 |
| Rectal resections                          | -0.70 (1.03)  | 0.50 (0.07, 3.77)  | 0.46   | 0.4991 |
| Small bowel procedures                     | 0.20 (0.23)   | 1.22 (0.78, 1.91)  | 0.75   | 0.3851 |
| Stomach lesion repair                      | 0.66 (0.47)   | 1.93 (0.77, 4.83)  | 1.97   | 0.1608 |
| Stomach procedures, other                  | -0.47 (0.63)  | 0.63 (0.18, 2.15)  | 0.55   | 0.4585 |
| Thyroid or parathyroid procedures          | -0.67 (0.62)  | 0.51 (0.15, 1.72)  | 1.18   | 0.2774 |
| Total pancreatectomy or whipple procedure  | -1.16 (0.66)  | 0.31 (0.09, 1.15)  | 3.06   | 0.0804 |
| Colectomy, total                           | 0.94 (0.41)   | 2.57 (1.16, 5.68)  | 5.42   | 0.0200 |
| Umbilical hernia repair                    | -0.23 (0.77)  | 0.80 (0.18, 3.57)  | 0.09   | 0.7676 |

The general surgery model for predicted risk of 30-day mortality was run on N=8,459 patients and has a c-statistic of 0.871.

**Appendix 2 Appendix b. Orthopedic Surgery Probability of Death Model.**

| Variable                                                    | Estimate<br>(SE) | Odds (95% CI)     | Chi Sq | P      |
|-------------------------------------------------------------|------------------|-------------------|--------|--------|
| Model Intercept                                             | -5.15 (0.32)     | 0.00 (0.00, 0.00) | 257.73 | <.0001 |
| Age category (65-69) (reference)                            | --               | --                | --     | --     |
| Age category (70-74 years)                                  | 0.07 (0.27)      | 1.07 (0.64, 1.82) | 0.07   | 0.7901 |
| Age category (75-79 years)                                  | 0.01 (0.26)      | 1.01 (0.60, 1.70) | 0.00   | 0.9738 |
| Age category (80-84 years)                                  | 0.34 (0.25)      | 1.41 (0.86, 2.30) | 1.81   | 0.1785 |
| Age category (85+ years)                                    | 0.98 (0.24)      | 2.66 (1.67, 4.23) | 16.91  | <.0001 |
| Sex (male)                                                  | 0.76 (0.12)      | 2.14 (1.70, 2.69) | 42.34  | <.0001 |
| Emergency admission                                         | 0.56 (0.17)      | 1.75 (1.26, 2.41) | 11.38  | 0.0007 |
| Transfer-in from another hospital's emergency department    | 0.63 (0.25)      | 1.87 (1.15, 3.04) | 6.46   | 0.0110 |
| Transfer-in status                                          | 1.04 (0.40)      | 2.82 (1.28, 6.21) | 6.63   | 0.0100 |
| Major Secondary Procedure                                   | 0.38 (0.19)      | 1.46 (1.02, 2.10) | 4.16   | 0.0415 |
| Comorbidities                                               |                  |                   |        |        |
| CHF                                                         | 0.49 (0.13)      | 1.64 (1.27, 2.11) | 14.64  | 0.0001 |
| Stroke                                                      | 0.19 (0.13)      | 1.21 (0.93, 1.57) | 2.00   | 0.1573 |
| Seizure                                                     | 0.12 (0.28)      | 1.13 (0.65, 1.97) | 0.19   | 0.6606 |
| Dementia                                                    | 0.68 (0.12)      | 1.97 (1.55, 2.49) | 31.22  | <.0001 |
| Past Myocardial Infarction                                  | -0.22 (0.17)     | 0.80 (0.57, 1.12) | 1.64   | 0.2004 |
| Past Arrhythmia                                             | 0.11 (0.12)      | 1.12 (0.88, 1.42) | 0.88   | 0.3495 |
| Unstable Angina                                             | 0.24 (0.34)      | 1.27 (0.65, 2.48) | 0.47   | 0.4937 |
| Angina                                                      | -0.10 (0.26)     | 0.91 (0.54, 1.51) | 0.15   | 0.7006 |
| Hypertension                                                | -0.18 (0.19)     | 0.84 (0.58, 1.20) | 0.92   | 0.3380 |
| Valvular Disease                                            | 0.09 (0.12)      | 1.10 (0.87, 1.38) | 0.61   | 0.4352 |
| Chronic Lung Disease                                        | 0.49 (0.12)      | 1.63 (1.29, 2.06) | 16.83  | <.0001 |
| Asthma                                                      | -0.15 (0.20)     | 0.86 (0.58, 1.28) | 0.54   | 0.4614 |
| Liver Disease                                               | 0.14 (0.22)      | 1.16 (0.75, 1.78) | 0.43   | 0.5139 |
| Renal Dysfunction                                           | 0.71 (0.12)      | 2.03 (1.60, 2.58) | 33.67  | <.0001 |
| Renal Failure                                               | 0.47 (0.19)      | 1.59 (1.10, 2.31) | 6.11   | 0.0134 |
| Diabetes                                                    | -0.19 (0.12)     | 0.82 (0.65, 1.05) | 2.48   | 0.1150 |
| Paraplegia                                                  | 0.02 (0.29)      | 1.02 (0.57, 1.80) | 0.00   | 0.9566 |
| Collagen Vascular Disease                                   | -0.20 (0.20)     | 0.82 (0.55, 1.22) | 0.94   | 0.3321 |
| Coagulopathy                                                | 1.23 (0.35)      | 3.41 (1.70, 6.83) | 11.92  | 0.0006 |
| Thrombocytopenia                                            | 0.16 (0.25)      | 1.17 (0.73, 1.90) | 0.42   | 0.5163 |
| Other Coagulopathy                                          | -0.17 (0.24)     | 0.85 (0.53, 1.35) | 0.48   | 0.4881 |
| Post-Inflammatory Pulmonary Fibrosis                        | 0.47 (0.22)      | 1.60 (1.03, 2.48) | 4.39   | 0.0362 |
| Cancer                                                      | -0.11 (0.12)     | 0.90 (0.71, 1.13) | 0.86   | 0.3527 |
| Abdominal Cancer                                            | 0.47 (0.58)      | 1.61 (0.52, 5.02) | 0.67   | 0.4144 |
| Hypothyroidism                                              | -0.04 (0.12)     | 0.96 (0.76, 1.22) | 0.11   | 0.7427 |
| Weight loss                                                 | 0.86 (0.13)      | 2.38 (1.83, 3.09) | 41.79  | <.0001 |
| Principal Procedures                                        |                  |                   |        |        |
| Open reduction of fracture (Reference)                      | --               | --                | --     | --     |
| Internal fixation of bone without fracture reduction, femur | -0.31 (0.25)     | 0.74 (0.45, 1.20) | 1.51   | 0.2186 |
| Total hip replacement                                       | -1.18 (0.29)     | 0.31 (0.17, 0.55) | 16.21  | <.0001 |
| Partial hip replacement                                     | 0.05 (0.14)      | 1.05 (0.80, 1.38) | 0.13   | 0.7171 |
| Total knee replacement                                      | -1.60 (0.32)     | 0.20 (0.11, 0.38) | 24.64  | <.0001 |
| Other hip procedures                                        | -1.67 (1.05)     | 0.19 (0.02, 1.46) | 2.55   | 0.1100 |
| Hip revisions                                               | -0.53 (0.42)     | 0.59 (0.26, 1.34) | 1.59   | 0.2077 |
| Other knee procedures                                       | -1.36 (0.49)     | 0.26 (0.10, 0.66) | 7.87   | 0.0050 |
| Lumbar fusion                                               | -1.59 (0.45)     | 0.20 (0.08, 0.50) | 12.19  | 0.0005 |
| Misc ortho procedures                                       | -2.22 (1.02)     | 0.11 (0.02, 0.81) | 4.69   | 0.0304 |
| Forearm repair                                              | -1.01 (0.53)     | 0.37 (0.13, 1.02) | 3.69   | 0.0546 |
| Humerus repair                                              | -0.86 (0.44)     | 0.43 (0.18, 1.02) | 3.71   | 0.0542 |

|                                 |              |                   |      |        |
|---------------------------------|--------------|-------------------|------|--------|
| Repairs of the tibia and fibula | -0.59 (0.33) | 0.55 (0.29, 1.06) | 3.18 | 0.0745 |
| Other shoulder procedures       | -0.99 (0.42) | 0.37 (0.16, 0.85) | 5.52 | 0.0188 |
| Other spinal procedures         | -0.85 (0.33) | 0.43 (0.23, 0.81) | 6.85 | 0.0089 |
| Cervical fusion                 | -0.94 (0.40) | 0.39 (0.18, 0.85) | 5.63 | 0.0177 |
| Dorsal lumbar fusion            | -0.94 (0.65) | 0.39 (0.11, 1.39) | 2.09 | 0.1480 |

The orthopedic surgery model for predicted risk of 30-day mortality was run on N=21,061 patients and has a c-statistic of 0.895.

### Appendix 2c. Vascular Surgery Probability of Death Model.

| Variable                                                                    | Estimate (SE) | Odds (95% CI)      | Chi Sq | P      |
|-----------------------------------------------------------------------------|---------------|--------------------|--------|--------|
| Model Intercept                                                             | -5.63 (0.63)  | 0.00 (0.00, 0.00)  | 80.88  | <.0001 |
| Age category (65-69) (reference)                                            | --            | --                 | --     | --     |
| Age category (70-74 years)                                                  | 0.38 (0.33)   | 1.46 (0.76, 2.77)  | 1.30   | 0.2537 |
| Age category (75-79 years)                                                  | 0.54 (0.32)   | 1.72 (0.92, 3.22)  | 2.86   | 0.0909 |
| Age category (80-84 years)                                                  | 0.76 (0.32)   | 2.14 (1.15, 3.99)  | 5.76   | 0.0164 |
| Age category (85+ years)                                                    | 1.04 (0.32)   | 2.82 (1.51, 5.29)  | 10.47  | 0.0012 |
| Sex (male)                                                                  | -0.14 (0.19)  | 0.87 (0.60, 1.25)  | 0.57   | 0.4485 |
| Emergency admission                                                         | 1.05 (0.20)   | 2.85 (1.93, 4.22)  | 27.53  | <.0001 |
| Transfer-in from another hospital's emergency department                    | 0.22 (0.32)   | 1.25 (0.67, 2.33)  | 0.48   | 0.4904 |
| Transfer-in status                                                          | 1.06 (0.48)   | 2.88 (1.12, 7.39)  | 4.81   | 0.0282 |
| Major Secondary Procedure                                                   | 0.44 (0.19)   | 1.55 (1.07, 2.24)  | 5.26   | 0.0219 |
| Comorbidities                                                               |               |                    |        |        |
| CHF                                                                         | -0.07 (0.21)  | 0.93 (0.62, 1.41)  | 0.10   | 0.7467 |
| Stroke                                                                      | 0.28 (0.20)   | 1.33 (0.89, 1.97)  | 1.94   | 0.1631 |
| Seizure                                                                     | -0.25 (0.45)  | 0.78 (0.32, 1.88)  | 0.31   | 0.5802 |
| Dementia                                                                    | 0.47 (0.21)   | 1.60 (1.06, 2.43)  | 4.89   | 0.0271 |
| Past Myocardial Infarction                                                  | 0.57 (0.21)   | 1.76 (1.17, 2.65)  | 7.43   | 0.0064 |
| Past Arrhythmia                                                             | 0.07 (0.20)   | 1.08 (0.73, 1.58)  | 0.13   | 0.7137 |
| Unstable Angina                                                             | -0.17 (0.45)  | 0.84 (0.35, 2.04)  | 0.14   | 0.7070 |
| Angina                                                                      | -0.70 (0.40)  | 0.50 (0.23, 1.08)  | 3.08   | 0.0791 |
| Hypertension                                                                | -0.17 (0.40)  | 0.84 (0.39, 1.84)  | 0.18   | 0.6690 |
| Valvular Disease                                                            | -0.18 (0.19)  | 0.83 (0.58, 1.20)  | 0.95   | 0.3289 |
| Chronic Lung Disease                                                        | 0.17 (0.19)   | 1.18 (0.82, 1.70)  | 0.78   | 0.3769 |
| Asthma                                                                      | -0.59 (0.36)  | 0.56 (0.28, 1.12)  | 2.69   | 0.1012 |
| Liver Disease                                                               | 0.82 (0.25)   | 2.27 (1.40, 3.66)  | 11.13  | 0.0009 |
| Renal Dysfunction                                                           | 0.95 (0.21)   | 2.59 (1.72, 3.90)  | 20.63  | <.0001 |
| Renal Failure                                                               | 0.15 (0.25)   | 1.16 (0.71, 1.90)  | 0.34   | 0.5575 |
| Diabetes                                                                    | -0.42 (0.20)  | 0.66 (0.45, 0.97)  | 4.50   | 0.0338 |
| Paraplegia                                                                  | 0.14 (0.36)   | 1.15 (0.58, 2.32)  | 0.16   | 0.6867 |
| Collagen Vascular Disease                                                   | 0.43 (0.30)   | 1.54 (0.86, 2.77)  | 2.08   | 0.1493 |
| Coagulopathy                                                                | -0.29 (0.84)  | 0.75 (0.14, 3.91)  | 0.12   | 0.7328 |
| Thrombocytopenia                                                            | 0.52 (0.28)   | 1.69 (0.98, 2.92)  | 3.52   | 0.0605 |
| Other Coagulopathy                                                          | 0.55 (0.25)   | 1.74 (1.06, 2.85)  | 4.77   | 0.0290 |
| Post-Inflammatory Pulmonary Fibrosis                                        | -0.01 (0.38)  | 0.99 (0.47, 2.08)  | 0.00   | 0.9748 |
| Cancer                                                                      | 0.05 (0.19)   | 1.05 (0.73, 1.52)  | 0.07   | 0.7984 |
| Abdominal Cancer                                                            | 0.07 (0.65)   | 1.07 (0.30, 3.80)  | 0.01   | 0.9152 |
| Hypothyroidism                                                              | -0.30 (0.21)  | 0.74 (0.49, 1.13)  | 1.96   | 0.1615 |
| Weight loss                                                                 | 0.38 (0.22)   | 1.47 (0.95, 2.28)  | 2.93   | 0.0868 |
| Principal Procedures                                                        |               |                    |        |        |
| Endovascular implantation of other graft in the abdominal aorta (Reference) | --            | --                 | --     | --     |
| Arteriovenostomy for renal dialysis                                         | 0.04 (0.61)   | 1.04 (0.31, 3.46)  | 0.00   | 0.9505 |
| Other (peripheral) vascular shunt or bypass                                 | 0.89 (0.48)   | 2.44 (0.95, 6.26)  | 3.46   | 0.0629 |
| Endovascular implantation of branching or fenestrated graft(s) in aorta     | 0.77 (0.83)   | 2.16 (0.42, 11.05) | 0.85   | 0.3567 |

|                                                |              |                    |       |        |
|------------------------------------------------|--------------|--------------------|-------|--------|
| Other endovascular procedures on other vessels | 1.17 (0.46)  | 3.22 (1.30, 8.01)  | 6.33  | 0.0119 |
| Other amputation below knee                    | 0.89 (0.52)  | 2.43 (0.88, 6.73)  | 2.93  | 0.0867 |
| Aortic distal bypass                           | 0.92 (0.74)  | 2.51 (0.59, 10.77) | 1.54  | 0.2141 |
| Artery procedure                               | 1.29 (0.51)  | 3.64 (1.35, 9.81)  | 6.52  | 0.0107 |
| Arteriovenostomy                               | 0.32 (0.64)  | 1.38 (0.40, 4.80)  | 0.26  | 0.6130 |
| Open carotid procedures                        | -0.86 (0.58) | 0.42 (0.14, 1.31)  | 2.21  | 0.1370 |
| Endarterectomy of the limbs                    | 0.76 (0.57)  | 2.14 (0.71, 6.48)  | 1.81  | 0.1791 |
| Open abdominal procedures                      | 1.75 (0.51)  | 5.75 (2.11, 15.71) | 11.66 | 0.0006 |
| Stenting procedures                            | 0.11 (0.69)  | 1.12 (0.29, 4.28)  | 0.03  | 0.8704 |
| Vessel repair                                  | 1.77 (0.45)  | 5.86 (2.41, 14.26) | 15.22 | <.0001 |

The vascular surgery model for predicted risk of 30-day mortality was run on N=3,872 patients and has a c-statistic of 0.868.

### Appendix 3. Complication Set for 30-day Complications and Failure to Rescue



| Complication                                  | Inclusion Criteria                                                                                                                                                                                                                                                                        | Exclusion Criteria                                                                                                                                                                                                                                                                                                 |
|-----------------------------------------------|-------------------------------------------------------------------------------------------------------------------------------------------------------------------------------------------------------------------------------------------------------------------------------------------|--------------------------------------------------------------------------------------------------------------------------------------------------------------------------------------------------------------------------------------------------------------------------------------------------------------------|
| Bronchospasm                                  | ICD-9: 51911                                                                                                                                                                                                                                                                              |                                                                                                                                                                                                                                                                                                                    |
| Cardiac Emergency                             | ICD-9: 41001, 41011, 41021, 41031, 41041, 41051, 41061, 41071, 41081, 41091, 4271, 42741, 4275, 78550, 78551, 3761, 3791, 9960, 9961, 9962, 9963, 9964, 9969<br>CPT: 92950, 92960, 92970, 92971, 92980, 92981, 92982, 92984, 92995, 92996, 92997, 92998                                   | ICD-9: 4275, 78550, 78551, 78559, 7991, 9393, 9963                                                                                                                                                                                                                                                                 |
| Cardiac Event                                 | ICD-9: 41189, 42612, 42613, 42682, 42689, 42731, 42781, 42789, 7943199601, 9971, 3606, 3607, 3609, 3778, 3780, 3781, 3782, 3783<br>CPT: 33206, 33207, 33208, 33210, 33211, 33212, 33213, 33214, 33216, 33217, 33240, 33249, 92953, 93501, 93510, 93511, 93514, 93524, 93526, 93527, 93529 |                                                                                                                                                                                                                                                                                                                    |
| Cerebrovascular Accident (CVA)/Stroke         | ICD-9: 431, 43301, 43311, 43321, 43331, 43381, 43391, 43401, 43411, 43491, 436, 99702                                                                                                                                                                                                     | ICD-9: 431, 43301, 43311, 43321, 43331, 43381, 43391, 43401, 43411, 43491, 436, 4380, 43810, 43811, 43812, 43813, 43814, 43819, 43820, 43821, 43822, 43830, 43831, 43832, 43840, 43841, 43842, 43850, 43851, 43852, 43853, 4386, 4387, 43881, 43882, 43883, 43884, 43885, 43889, 4389, 99702, V1253, V1254, V1259, |
| CHF                                           | ICD-9: 4280, 4281, 42820, 42821, 42823, 42830, 42831, 42833, 42840, 42841, 42843, 4289, 5184, 9971                                                                                                                                                                                        | ICD-9: 39891, 40201, 40211, 40291, 40401, 40403, 40411, 40413, 40491, 40493, 4280, 4281, 42820, 42821, 42822, 42823, 42830, 42831, 42832, 42833, 42840, 42841, 42842, 42843, 4289, 5184,                                                                                                                           |
| Coma                                          | ICD-9: 3481, 5722, 78001                                                                                                                                                                                                                                                                  |                                                                                                                                                                                                                                                                                                                    |
| Compartment Syndrome                          | ICD-9: 9588, 99889                                                                                                                                                                                                                                                                        |                                                                                                                                                                                                                                                                                                                    |
| Decubitus Ulcer                               | ICD-9: 70700, 70701, 70702, 70703, 70704, 70705, 70706, 70707, 70709, 70720, 70721, 70722, 70723, 70724, 70725,                                                                                                                                                                           |                                                                                                                                                                                                                                                                                                                    |
| Deep Vein Thrombosis                          | ICD-9: 45340, 45341, 45342, 45350, 45351, 45352, 4536, 45371, 45372, 45373, 45374, 45375, 45376, 45377, 45379, 45381, 45382, 45383, 45384, 45385, 45386, 45387, 45389, 387                                                                                                                |                                                                                                                                                                                                                                                                                                                    |
| Deep Wound Infection/Wound Complication       | ICD-9: 99830, 99831, 99832, 99833, 99859, 9986, 5461, 8604, 8622, 8659, 8670, 8674<br>CPT: 10180, 11040, 11041, 11042, 11043, 11044, 11045, 11046, 11047                                                                                                                                  | ICD-9: 70700, 70701, 70702, 70703, 70704, 70705, 70706, 70707, 70709, 70720, 70721, 70722, 70723, 70724, 70725,                                                                                                                                                                                                    |
| Disseminated Intravascular Coagulopathy (DIC) | ICD-9: 2866                                                                                                                                                                                                                                                                               |                                                                                                                                                                                                                                                                                                                    |
| Gangrene/Amputation                           | ICD-9: 72886, 7854, 8400, 8401, 8402, 8403, 8404, 8405, 8406, 8407, 8408, 8409,                                                                                                                                                                                                           | ICD-9: , 8400, 8401, 8402, 8403, 8404, 8405, 8406, 8407, 8408, 8409, 8410, 8411,                                                                                                                                                                                                                                   |

| Complication                                  | Inclusion Criteria                                                                                                                                                                                                                                                                                                                                                                                                                                                           | Exclusion Criteria                                                                                                                                                                                                                                                                                                                                                                                                                                                                                                                                                                                                                                                                                                                                                                                                                                                         |
|-----------------------------------------------|------------------------------------------------------------------------------------------------------------------------------------------------------------------------------------------------------------------------------------------------------------------------------------------------------------------------------------------------------------------------------------------------------------------------------------------------------------------------------|----------------------------------------------------------------------------------------------------------------------------------------------------------------------------------------------------------------------------------------------------------------------------------------------------------------------------------------------------------------------------------------------------------------------------------------------------------------------------------------------------------------------------------------------------------------------------------------------------------------------------------------------------------------------------------------------------------------------------------------------------------------------------------------------------------------------------------------------------------------------------|
|                                               | 8410, 8411, 8412, 8413, 8414, 8415, 8416, 8417, 8418, 8419<br>CPT: 23900, 23920, 24900, 24920, 24930, 24931, 24940, 25900, 25905, 25909, 25920, 25924, 25927, 25931, 26910, 26951, 26952, 27290, 27295, 27590, 27591, 27592, 27596, 27598, 27880, 27881, 27882, 27886, 27888, 27889, 28800, 28805, 28810, 28820, 28825                                                                                                                                                       | 8412, 8413, 8414, 8415, 8416, 8417, 8418, 8419                                                                                                                                                                                                                                                                                                                                                                                                                                                                                                                                                                                                                                                                                                                                                                                                                             |
| GI Bleed and Blood Loss                       | ICD-9: 2851, 4560, 45620, 5307, 53082, 53100, 53101, 53120, 53121, 53130, 53131, 53190, 53191, 53200, 53201, 53210, 53211, 53220, 53221, 53230, 53231, 53290, 53291, 53300, 53301, 53310, 53311, 53320, 53321, 53330, 53331, 53390, 53391, 53400, 53401, 53410, 53411, 53420, 53421, 53430, 53431, 53490, 53491, 53501, 53540, 53541, 53551, 53561, 53570, 53571, 53784, 56212, 56213, 5693, 56985, 5780, 5781, 5789<br>CPT: 43227, 43255, 44366, 44391, 45317, 45334, 75726 | ICD-9: 2910, 2911, 2912, 2913, 2914, 2915, 29181, 29182, 29189, 2919, 30300, 30301, 30302, 30303, 30390, 30391, 30392, 30500, 30501, 30502, 30503, 800xx, 801xx, 802xx, 803xx, 804xx, 805xx, 806xx, 807xx, 808xx, 809xx, 810xx, 811xx, 812xx, 813xx, 814xx, 815xx, 817xx, 818xx, 819xx, 820xx, 821xx, 822xx, 823xx, 824xx, 825xx, 827xx, 828xx, 829xx, 830xx, 831xx, 832xx, 833xx, 834xx, 835xx, 836xx, 837xx, 838xx, 839xx, 850xx, 851xx, 852xx, 853xx, 854xx, 860xx, 861xx, 862xx, 863xx, 864xx, 865xx, 866xx, 867xx, 868xx, 869xx, 870xx, 871xx, 872xx, 873xx, 874xx, 875xx, 876xx, 877xx, 878xx, 879xx, 880xx, 881xx, 882xx, 884xx, 887xx, 890xx, 891xx, 892xx, 894xx, 896xx, 897xx, 900xx, 901xx, 902xx, 903xx, 904xx, 925xx, 926xx, 927xx, 928xx, 929xx, 940xx, 941xx, 942xx, 943xx, 944xx, 945xx, 946xx, 947xx, 948xx, 949xx, 952xx, 953xx, 958xx, 4440, 4441, 4442 |
| Hepatitis/Jaundice                            | ICD-9: 570, 5733                                                                                                                                                                                                                                                                                                                                                                                                                                                             |                                                                                                                                                                                                                                                                                                                                                                                                                                                                                                                                                                                                                                                                                                                                                                                                                                                                            |
| Hypotension/<br>Shock/Hypovolemia             | ICD-9: 27650, 27651, 27652, 4589, 78550, 78551, 78552, 78559, 7963, 9950, 9954, 99800, 99801, 99802, 99809                                                                                                                                                                                                                                                                                                                                                                   |                                                                                                                                                                                                                                                                                                                                                                                                                                                                                                                                                                                                                                                                                                                                                                                                                                                                            |
| Internal Organ<br>Damage                      | ICD-9: 34931, 34939, 99811, 99812, 99813, 9982, 3941, 5412, 5419<br>CPT: 35800, 35820, 35840, 35860                                                                                                                                                                                                                                                                                                                                                                          |                                                                                                                                                                                                                                                                                                                                                                                                                                                                                                                                                                                                                                                                                                                                                                                                                                                                            |
| Intestinal<br>Obstruction                     | ICD-9: 5570, 56081, 5609, 99741, 99749                                                                                                                                                                                                                                                                                                                                                                                                                                       | ICD-9: 5570, 56081, 5609,                                                                                                                                                                                                                                                                                                                                                                                                                                                                                                                                                                                                                                                                                                                                                                                                                                                  |
| Necrosis of the<br>Bone-Thermal or<br>Aseptic | ICD-9: 73340, 73341, 73342, 73343, 73344, 73345, 73349                                                                                                                                                                                                                                                                                                                                                                                                                       |                                                                                                                                                                                                                                                                                                                                                                                                                                                                                                                                                                                                                                                                                                                                                                                                                                                                            |
| Nerve Compression                             | ICD-9: 3530, 3532, 7234, 9530, 9531, 9532, 9533, 9534, 9535, 9538, 9539, 9548, 9549, 9550, 9551, 9552, 9553, 9554, 9555, 9556, 9557, 9558, 9559, 9560, 9561, 9562, 9563, 9564, 9565, 9568, 9569, 9570, 9571, 9578, 9579                                                                                                                                                                                                                                                      |                                                                                                                                                                                                                                                                                                                                                                                                                                                                                                                                                                                                                                                                                                                                                                                                                                                                            |
| Nervous System<br>Complications               | ICD-9: 99700, 99701, 99709, 0331, 8914, 8919                                                                                                                                                                                                                                                                                                                                                                                                                                 |                                                                                                                                                                                                                                                                                                                                                                                                                                                                                                                                                                                                                                                                                                                                                                                                                                                                            |

| <b>Complication</b>        | <b>Inclusion Criteria</b>                                                                                                                                                                                                                                                                                                               | <b>Exclusion Criteria</b>                                                                                                                                                                                                                                                           |
|----------------------------|-----------------------------------------------------------------------------------------------------------------------------------------------------------------------------------------------------------------------------------------------------------------------------------------------------------------------------------------|-------------------------------------------------------------------------------------------------------------------------------------------------------------------------------------------------------------------------------------------------------------------------------------|
| Orthopedic Complication    | ICD-9: 99640, 99641, 99642, 99643, 99644, 99645, 99646, 99647, 99649, 99666, 99677, 99678, 7860, 7869, 7971, 7975, 7976                                                                                                                                                                                                                 | ICD-9: , 0070, 0071, 0072, 0073, 0074, 0075, 0076, 0077, 0080, 0081, 0082, 0083, 0084, 8153, 8155, 8159, 8183, 8185                                                                                                                                                                 |
| Osteomyelitis              | ICD-9: 73000, 73001, 73002, 73003, 73004, 73005, 73006, 73007, 73008, 73009, 73020, 73021, 73022, 73023, 73024, 73025, 73026, 73027, 73028, 73029, 99667                                                                                                                                                                                | ICD-9: 73000, 73001, 73002, 73003, 73004, 73005, 73006, 73007, 73008, 73009, 73020, 73021, 73022, 73023, 73024, 73025, 73026, 73027, 73028, 73029, 99667,                                                                                                                           |
| Pancreatitis               | ICD-9: 5770                                                                                                                                                                                                                                                                                                                             |                                                                                                                                                                                                                                                                                     |
| Perforation                | ICD-9: 34931, 34939, 5304, 56983, 9982                                                                                                                                                                                                                                                                                                  |                                                                                                                                                                                                                                                                                     |
| Peritonitis                | ICD-9: 5670, 5671, 56721, 56722, 56723, 56729, 56738, 56739, 5679, 5695, 5491                                                                                                                                                                                                                                                           |                                                                                                                                                                                                                                                                                     |
| Phlebitis                  | ICD-9: 4510, 45111, 45119, 4512, 45181, 45182, 45184, 45189, 4519                                                                                                                                                                                                                                                                       |                                                                                                                                                                                                                                                                                     |
| Pneumonia, other           | ICD-9: 481, 4820, 4821, 4822, 48230, 48231, 48232, 48239, 48240, 48241, 48242, 48249, 48281, 48282, 48283, 48284, 48289, 4829, 485, 486, 514, 99731, 99732, 99739                                                                                                                                                                       | ICD-9: 042, 1363, 27900, 27901, 27902, 27903, 27904, 27905, 27906, 27909, 27910, 27911, 27912, 27913, 27919, 2792, 2793, 27941, 27949, 2798, 2799, 4800, 4801, 4802, 4803, 4808, 4809, 4830, 4831, 4838, 4841, 4843, 4845, 4846, 4847, 4848, 4870, 4871, 4878, 48801, 48811, 48881, |
| Pneumonia-Aspiration       | ICD-9: 4829, 485, 486, 5070, 5071, 5078, 99731, 99732, 99739                                                                                                                                                                                                                                                                            |                                                                                                                                                                                                                                                                                     |
| Pneumothorax/Effusion      | ICD-9: 5120, 5121, 5122, 51281, 51282, 51283, 51284, 51289, 5180, 3404, 3406, 3491                                                                                                                                                                                                                                                      |                                                                                                                                                                                                                                                                                     |
| Post-Surgical Complication | ICD-9: 99700, 99701, 9972, 9975, 99851, 99881, 99882, 99889, 9989, 9990, 9991, 9992, 99931, 99932, 99933, 99934, 99939, 99941, 99942, 99949, 99951, 99952, 99959, 99960, 99961, 99962, 99963, 99969, 99970, 99971, 99972, 99973, 99974, 99975, 99976, 99977, 99978, 99979, 99980, 99981, 99982, 99983, 99984, 99985, 99988, 99989, 9999 |                                                                                                                                                                                                                                                                                     |
| Psychosis                  | ICD-9: 2920, 29211, 29212, 2922, 29281, 29282, 29283, 29284, 29285, 29289, 2929, 2930, 2939, 29420, 29421, 2948, 2949                                                                                                                                                                                                                   |                                                                                                                                                                                                                                                                                     |
| Pulmonary embolus          | ICD-9: 41511, 41512, 41513, 9581<br>CPT: 75741, 75743, 75894, 75896, 75940, 78579, 78580, 78582, 78584, 78585, 78586, 78587, 78588, 78591, 78593, 78594, 78599                                                                                                                                                                          |                                                                                                                                                                                                                                                                                     |
| Pyelonephritis             | ICD-9: 59010, 59011, 5902, 5903, 59080, 59081, 5909                                                                                                                                                                                                                                                                                     |                                                                                                                                                                                                                                                                                     |
| Renal Dysfunction          | ICD-9: 5845, 5846, 5847, 5848, 5849, 7885, 7925, 99668, E8722, E8791, V4511, V560, V561, V562, V5631, V5632, V568, 3895, 3927, 3943, 5494, 5498<br>CPT: 4054F, 4055F, 90935, 90937, 90945, 90947, 90970, 90997, 90999                                                                                                                   | ICD-9: 3942, 7925, 99668, 99673, E8722, E8791, V4511, V560, V561, V562, V5631, V5632, V568<br>CPT: 36833, 90966, 90970, 90989, 90935, 90937, 90940, 90945, 90947, 90999, 99512, 99601, 4051F, 4052F, 4053F, 4054F, 4055F                                                            |

| <b>Complication</b>             | <b>Inclusion Criteria</b>                                                                                                   | <b>Exclusion Criteria</b>                                                                                                          |
|---------------------------------|-----------------------------------------------------------------------------------------------------------------------------|------------------------------------------------------------------------------------------------------------------------------------|
| Respiratory Compromise          | ICD-9: 51851, 51852, 51853, 51881, 51889, 7991, 311, 3121, 3129, 9604, 9672<br>CPT: 31500, 31603, 31605, 31610              |                                                                                                                                    |
| Return to Surgery               | ICD-9: 9984, 9987, 311, 3121, 3129, 9604, 9672<br>CPT: 32110, 32120, 32150, 49002                                           |                                                                                                                                    |
| Seizure                         | ICD-9: 78031, 78033, 78039                                                                                                  | ICD-9: 34500, 34501, 34510, 34511, 3452, 3453, 34540, 34541, 34550, 34551, 34560, 34561, 34570, 34571, 34580, 34581, 34590, 34591, |
| Sepsis                          | ICD-9: 0380, 03810, 03811, 03812, 03819, 0382, 0383, 03840, 03841, 03842, 03843, 03844, 03849, 0388, 0389, 449, 78552, 7907 |                                                                                                                                    |
| Transient Ischemic Attack (TIA) | ICD-9: 4350, 4351, 4352, 4353, 4358, 4359                                                                                   |                                                                                                                                    |
| Urinary Tract Infection         | ICD-9: 5950, 5953, 5959, 5990                                                                                               |                                                                                                                                    |

The inclusion and exclusion ICD-9 diagnosis, ICD-9 procedure, and CPT codes were used to define in-hospital complications among surgical patients.

#### Appendix 4. Definitions of Resource Utilization-based Costs and Method of Cost Adjustment for Differences in Nurse Staffing and Skill Mix

We defined costs by resource utilization, as in previous work.<sup>1-4</sup>

The algorithm is as follows:

##### A. Exclusions for Non-Acute Care

1. Inpatient Hospital (Part A) File
  - a. Exclude claim for hospitalizations in non-acute settings using 6-digit Medicare hospital ID (hospital identified as other than “Short-term (General and Specialty) Hospital” or “Critical Access Hospital”)
    - i. Include only if the 3<sup>rd</sup> position of the ID is equal to “0” or if the 3<sup>rd</sup> and 4<sup>th</sup> positions are equal to “13”
    - ii. Exclude if 4<sup>th</sup>, 5<sup>th</sup>, or 6<sup>th</sup> position in identifier is not a number
  - b. Exclude claim if DRG = 945 or 946 (Rehabilitation)
2. Outpatient File
  - a. Exclude claim for encounters in non-acute settings using 6-digit Medicare hospital ID (hospital identified as other than “Short-term (General and Specialty) Hospital” or “Critical Access Hospital”)
    - i. Include only if the 3<sup>rd</sup> position of the ID is equal to “0” or if the 3<sup>rd</sup> and 4<sup>th</sup> positions are equal to “13”
    - ii. Exclude if 4<sup>th</sup>, 5<sup>th</sup>, or 6<sup>th</sup> position in identifier is not a number
  - b. Exclude claim if principal diagnosis = V57 or subterms (Care involving use of rehabilitation procedures)
3. Physician/Carrier (Part B) File
  - a. Exclude any claim if the from and through dates fall on or between the admission and discharge dates of a non-acute hospitalization (as defined above) or between the from and through dates of a claim for outpatient care in a non-acute hospital
  - b. Exclude claim if no line item place of service codes from the following list appear:
 

|                                                 |                                          |
|-------------------------------------------------|------------------------------------------|
| 11 = Office                                     | 15 = Mobile Unit                         |
| 20 = Urgent Care Facility                       | 21 = Inpatient hospital                  |
| 22 = Outpatient hospital                        | 23 = Emergency room - hospital           |
| 24 = Ambulatory surgical center                 | 41 = Ambulance - land                    |
| 42 = Ambulance - air or water                   | 50 = Federally qualified health centers  |
| 65 = End stage renal disease treatment facility | 71 = State or local public health clinic |
| 81 = Independent laboratory                     |                                          |
  - c. Exclude claim if principal diagnosis = V57 or subterms (Care involving use of rehabilitation procedures)

##### B. Resource Utilization-Based Cost Accounting

1. Facility and Accommodation Costs from the Inpatient File:
  - a. Accommodations:
    - i. Determine number of inpatient critical care and non-critical care days from revenue centers in the Inpatient file.
    - ii. Multiply number of critical care/non-critical care days by average daily cost for each type (adjust to 2015 values using the Bureau of Labor & Statistics inflation factor, hospital component - CCM: \$4,866.52; Non-CCM: \$1,594.97)

| Revenue Centers for:                              |                               |
|---------------------------------------------------|-------------------------------|
| Non-Critical Care                                 | Critical Care                 |
| 0100-0101 All-inclusive rate-room and board       | 0200-0205 Intensive Care      |
| 0110-0119 Private medical or general              | 0207-0209 Intensive Care      |
| 0120-0129 Semi-private 2 bed (medical or general) | 0210-0213, 0219 Coronary Care |
| 0130-0139 Semi-private 3 and 4 beds               |                               |
| 0140-0149 Private (deluxe)                        |                               |
| 0150-0159 Room & Board ward (medical or general)  |                               |



Hospital-level hourly adjustment =

$$\frac{\text{year}}{365.25 \text{ days}} * \frac{7 \text{ days}}{1 \text{ week}} * \frac{\text{week}}{36 \text{ hours}} * 1.2265$$

$$* \left\{ \left[ (\text{RN Ratio}_{\text{Hosp } i} - \text{RN Ratio}_{\text{Ave}}) * \text{RN Salary}_{\text{National Ave}} \right] \right.$$

$$+ \left[ (\text{LPN Ratio}_{\text{Hosp } i} - \text{LPN Ratio}_{\text{Ave}}) * \text{LPN Salary}_{\text{National Ave}} \right]$$

$$\left. + \left[ (\text{UAP Ratio}_{\text{Hosp } i} - \text{UAP Ratio}_{\text{Ave}}) * \text{UAP Salary}_{\text{National Ave}} \right] \right\}$$

Patient-level adjustment = (hospital-level adjustment)\*(patient LOS days)\*(24 hours/day)

Average values for staffing ratios, calculated as the average value among our 306 study hospitals:

- RNs/patient: 0.3472
- LPNs/patient: 0.0102
- UAPs/patient: 0.0919

National average salaries in 2014 (figures from the Bureau of Labor Statistics's Occupational Employment Statistics):

| Type of Nurse | Nat'l Salary | Hourly Wage w/out Benefits | Hourly Wage w/ Benefits |
|---------------|--------------|----------------------------|-------------------------|
| RN            | \$69,790     | \$37.15                    | \$45.57                 |
| LPN           | \$43,420     | \$23.12                    | \$28.35                 |
| UAP           | \$26,250     | \$13.97                    | \$17.14                 |

Note. Data source for salary figures<sup>7</sup>

Description of other constants in the formula:

- 365.25 days / (7 days/week) is the estimated number of working weeks in a calendar year.
- 36 is the estimated number of work hours per week.

5. Summary Equation:

$$C_{i,30} = (D_{inp}^{CC} * 4,866.52 + D_{inp}^{NCC} * 1,594.97) + (T_{OR} * 22.30) + AU * 22.55 + ER * 554.12 + \sum RVU_j * 35.84 + RC$$

$D_{inp}^{CC}$  = Number of days in critical care

$D_{inp}^{NCC}$  = Number of days on hospital floor

$T_{OR}$  = Number of minutes in operating room

AU = Number of anesthesia units

ER = Number of emergency room days

$RVU_j$  = Number of all j RVUs from all bills over defined time period that includes all outpatient and office visits

RC = Readmission costs—all costs associated with hospitalization that began within 30 days of readmission

## Appendix 5. Correlation and Principal Component Analysis of Nursing Resource Measures

### Pearson correlations

|                            | Staffing (2)          | Skill Mix (3)          | BSN (4)               |
|----------------------------|-----------------------|------------------------|-----------------------|
| Nurse work environment (1) | 0.16508<br>(p=0.0002) | -0.08897<br>(p=0.0442) | 0.27527<br>(p<0.0001) |
| Staffing (2)               | --                    | 0.19172<br>(p<0.0001)  | 0.18652<br>(p<0.0001) |
| Skill Mix (3)              | --                    | --                     | 0.07802<br>(p=0.0778) |

### Spearman correlations

|                            | Staffing (2)          | Skill Mix (3)          | BSN (4)               |
|----------------------------|-----------------------|------------------------|-----------------------|
| Nurse work environment (1) | 0.16010<br>(p=0.0003) | -0.13066<br>(p=0.0031) | 0.26182<br>(p<0.0001) |
| Staffing (2)               | --                    | 0.21955<br>(p<0.0001)  | 0.22653<br>(p<0.0001) |
| Skill Mix (3)              | --                    | --                     | 0.07675<br>(p=0.0827) |

Note. The direction of the staffing variable was adjusted to be consistent with the others, so that a higher number can be interpreted as more favorable.

### Principal component analysis

| Nursing Variable       | Principal Component Weight |
|------------------------|----------------------------|
| Nurse work environment | 0.529029                   |
| Staffing               | 0.550792                   |
| BSN education          | 0.600448                   |
| Skill Mix              | 0.237104                   |



## Appendix 6. Definitions of Principal Procedures

The following lists include the ICD-9-CM principal procedures for this study. Matching of case and controls was exact for each principal procedure. Procedures were formed into Procedure Groups based on anatomical and technical similarity, which allowed the patients to be divided into smaller groups for matching purposes.

### Appendix 6a. General Surgery

| ICD-9 | Procedure Group                  | Procedure Name                                                                            |
|-------|----------------------------------|-------------------------------------------------------------------------------------------|
| 0722  | Adrenal Procedures               | Unilateral adrenalectomy                                                                  |
| 0729  | Adrenal Procedures               | Other partial adrenalectomy                                                               |
| 4701  | Appendectomy                     | Laparoscopic appendectomy                                                                 |
| 4709  | Appendectomy                     | Other appendectomy                                                                        |
| 4590  | Bowel Anastomoses                | Intestinal anastomosis, not otherwise specified                                           |
| 4591  | Bowel Anastomoses                | Small-to-small intestinal anastomosis                                                     |
| 4592  | Bowel Anastomoses                | Anastomosis of small intestine to rectal stump                                            |
| 4593  | Bowel Anastomoses                | Other small-to-large intestinal anastomosis                                               |
| 4594  | Bowel Anastomoses                | Large-to-large intestinal anastomosis                                                     |
| 4673  | Bowel Procedures, Other          | Suture of laceration of small intestine, except duodenum                                  |
| 4674  | Bowel Procedures, Other          | Closure of fistula of small intestine, except duodenum                                    |
| 4675  | Bowel Procedures, Other          | Suture of laceration of large intestine                                                   |
| 4679  | Bowel Procedures, Other          | Other repair of intestine                                                                 |
| 8542  | Breast Procedures                | Bilateral simple mastectomy                                                               |
| 8544  | Breast Procedures                | Bilateral extended simple mastectomy                                                      |
| 8523  | Breast Procedures                | Subtotal mastectomy                                                                       |
| 8541  | Breast Procedures                | Unilateral simple mastectomy                                                              |
| 8543  | Breast Procedures                | Unilateral extended simple mastectomy                                                     |
| 8545  | Breast Procedures                | Unilateral radical mastectomy                                                             |
| 8547  | Breast Procedures                | Unilateral extended radical mastectomy                                                    |
| 4240  | Esophageal Procedures            | Esophagectomy, not otherwise specified                                                    |
| 4241  | Esophageal Procedures            | Partial esophagectomy                                                                     |
| 4242  | Esophageal Procedures            | Total esophagectomy                                                                       |
| 427   | Esophageal Procedures            | Esophagomyotomy                                                                           |
| 5321  | Femoral Hernia Procedures        | Unilateral repair of femoral hernia with graft or prosthesis                              |
| 5329  | Femoral Hernia Procedures        | Other unilateral femoral herniorrhaphy                                                    |
| 5123  | Gallbladder Procedures           | Laparoscopic cholecystectomy                                                              |
| 5122  | Gallbladder Procedures           | Cholecystectomy                                                                           |
| 5124  | Gallbladder Procedures           | Laparoscopic partial cholecystectomy                                                      |
| 5132  | Gallbladder Procedures           | Anastomosis of gallbladder to intestine                                                   |
| 5136  | Gallbladder Procedures           | Choledochoenterostomy                                                                     |
| 5137  | Gallbladder Procedures           | Anastomosis of hepatic duct to gastrointestinal tract                                     |
| 5141  | Gallbladder Procedures           | Common duct exploration for removal of calculus                                           |
| 4438  | Gastric Bypass                   | Laparoscopic gastroenterostomy                                                            |
| 4439  | Gastric Bypass                   | Other gastroenterostomy without gastrectomy                                               |
| 5369  | Incisional and abdominal hernias | Other and open repair of other hernia of anterior abdominal wall with graft or prosthesis |
| 5361  | Incisional and abdominal hernias | Other open incisional hernia repair with graft or prosthesis                              |
| 5372  | Incisional and abdominal hernias | Other and open repair of diaphragmatic hernia, abdominal approach                         |
| 5375  | Incisional and abdominal hernias | Repair of diaphragmatic hernia, abdominal approach, not otherwise specified               |
| 5305  | Inguinal Hernia Procedures       | Repair of inguinal hernia with graft or prosthesis, not otherwise specified               |
| 1711  | Inguinal Hernia Procedures       | Laparoscopic repair of direct inguinal hernia with graft or prosthesis                    |
| 1712  | Inguinal Hernia Procedures       | Laparoscopic repair of indirect inguinal hernia with graft or prosthesis                  |

| ICD-9 | Procedure Group            | Procedure Name                                                                                          |
|-------|----------------------------|---------------------------------------------------------------------------------------------------------|
| 1713  | Inguinal Hernia Procedures | Laparoscopic repair of inguinal hernia with graft or prosthesis, not otherwise specified                |
| 1721  | Inguinal Hernia Procedures | Laparoscopic bilateral repair of direct inguinal hernia with graft or prosthesis                        |
| 1723  | Inguinal Hernia Procedures | Laparoscopic bilateral repair of inguinal hernia, one direct and one indirect, with graft or prosthesis |
| 1724  | Inguinal Hernia Procedures | Laparoscopic bilateral repair of inguinal hernia with graft or prosthesis, not otherwise specified      |
| 5301  | Inguinal Hernia Procedures | Other and open repair of direct inguinal hernia                                                         |
| 5303  | Inguinal Hernia Procedures | Other and open repair of direct inguinal hernia with graft or prosthesis                                |
| 5302  | Inguinal Hernia Procedures | Other and open repair of indirect inguinal hernia                                                       |
| 5304  | Inguinal Hernia Procedures | Other and open repair of indirect inguinal hernia with graft or prosthesis                              |
| 5300  | Inguinal Hernia Procedures | Unilateral repair of inguinal hernia, not otherwise specified                                           |
| 5314  | Inguinal Hernia Procedures | Other and open bilateral repair of direct inguinal hernia with graft or prosthesis                      |
| 5315  | Inguinal Hernia Procedures | Other and open bilateral repair of indirect inguinal hernia with graft or prosthesis                    |
| 5317  | Inguinal Hernia Procedures | Bilateral inguinal hernia repair with graft or prosthesis, not otherwise specified                      |
| 4571  | Large Bowel Resection      | Open and other multiple segmental resection of large intestine                                          |
| 4572  | Large Bowel Resection      | Open and other cecectomy                                                                                |
| 4573  | Large Bowel Resection      | Open and other right hemicolectomy                                                                      |
| 4574  | Large Bowel Resection      | Open and other resection of transverse colon                                                            |
| 4575  | Large Bowel Resection      | Open and other left hemicolectomy                                                                       |
| 4576  | Large Bowel Resection      | Open and other sigmoidectomy                                                                            |
| 4579  | Large Bowel Resection      | Other and unspecified partial excision of large intestine                                               |
| 1731  | Large Bowel Resection      | Laparoscopic multiple segmental resection of large intestine                                            |
| 1732  | Large Bowel Resection      | Laparoscopic cecectomy                                                                                  |
| 1733  | Large Bowel Resection      | Laparoscopic right hemicolectomy                                                                        |
| 1734  | Large Bowel Resection      | Laparoscopic resection of transverse colon                                                              |
| 1735  | Large Bowel Resection      | Laparoscopic left hemicolectomy                                                                         |
| 1736  | Large Bowel Resection      | Laparoscopic sigmoidectomy                                                                              |
| 1739  | Large Bowel Resection      | Other laparoscopic partial excision of large intestine                                                  |
| 4581  | Large Bowel Resection      | Laparoscopic total intra-abdominal colectomy                                                            |
| 4582  | Large Bowel Resection      | Open total intra-abdominal colectomy                                                                    |
| 4583  | Large Bowel Resection      | Other and unspecified total intra-abdominal colectomy                                                   |
| 5022  | Liver Procedures           | Partial hepatectomy                                                                                     |
| 5029  | Liver Procedures           | Other destruction of lesion of liver                                                                    |
| 503   | Liver Procedures           | Lobectomy of liver                                                                                      |
| 5451  | Lysis of Adhesions         | Laparoscopic lysis of peritoneal adhesions                                                              |
| 5459  | Lysis of Adhesions         | Other lysis of peritoneal adhesions                                                                     |
| 4603  | Ostomy Procedures          | Exteriorization of large intestine                                                                      |
| 4642  | Ostomy Procedures          | Repair of pericostomy hernia                                                                            |
| 4610  | Ostomy Procedures          | Colostomy, not otherwise specified                                                                      |
| 4611  | Ostomy Procedures          | Temporary colostomy                                                                                     |
| 4613  | Ostomy Procedures          | Other Permanent colostomy                                                                               |
| 4651  | Ostomy Procedures          | Closure of stoma of small intestine                                                                     |
| 4652  | Ostomy Procedures          | Closure of stoma of large intestine                                                                     |
| 4601  | Ostomy Procedures          | Exteriorization of small intestine                                                                      |
| 4620  | Ostomy Procedures          | Ileostomy, not otherwise specified                                                                      |
| 4623  | Ostomy Procedures          | Other permanent ileostomy                                                                               |
| 4639  | Ostomy Procedures          | Other enterostomy                                                                                       |
| 5252  | Pancreatic Procedures      | Distal pancreatectomy                                                                                   |
| 5259  | Pancreatic Procedures      | Other partial pancreatectomy                                                                            |

| ICD-9 | Procedure Group             | Procedure Name                                                                 |
|-------|-----------------------------|--------------------------------------------------------------------------------|
| 526   | Pancreatic Procedures       | Total pancreatectomy                                                           |
| 527   | Pancreatic Procedures       | Radical pancreaticoduodenectomy                                                |
| 0681  | Parathyroidectomy           | Complete parathyroidectomy                                                     |
| 0689  | Parathyroidectomy           | Other parathyroidectomy                                                        |
| 5493  | PD Access Procedure         | Creation of cutaneoperitoneal fistula                                          |
| 4862  | Rectal Procedures           | Anterior resection of rectum with synchronous colostomy                        |
| 4863  | Rectal Procedures           | Other anterior resection of rectum                                             |
| 4869  | Rectal Procedures           | Other resection of rectum                                                      |
| 4875  | Rectal Procedures           | Abdominal proctopexy                                                           |
| 4876  | Rectal Procedures           | Other proctopexy                                                               |
| 4879  | Rectal Procedures           | Other repair of rectum                                                         |
| 4849  | Rectal Procedures           | Other pull-through resection of rectum                                         |
| 4850  | Rectal Procedures           | Abdominoperineal resection of the rectum, not otherwise specified              |
| 4851  | Rectal Procedures           | Laparoscopic abdominoperineal resection of the rectum                          |
| 4852  | Rectal Procedures           | Open abdominoperineal resection of the rectum                                  |
| 4859  | Rectal Procedures           | Other abdominoperineal resection of the rectum                                 |
| 7072  | Repair of Vaginal Fistulas  | Repair of colovaginal fistula                                                  |
| 7073  | Repair of Vaginal Fistulas  | Repair of rectovaginal fistula                                                 |
| 4561  | Small Bowel Resection       | Multiple segmental resection of small intestine                                |
| 4562  | Small Bowel Resection       | Other partial resection of small intestine                                     |
| 4563  | Small Bowel Resection       | Total removal of small intestine                                               |
| 415   | Splenectomy                 | Total splenectomy                                                              |
| 435   | Stomach Procedures          | Partial gastrectomy with anastomosis to esophagus                              |
| 436   | Stomach Procedures          | Partial gastrectomy with anastomosis to duodenum                               |
| 437   | Stomach Procedures          | Partial gastrectomy with anastomosis to jejunum                                |
| 4389  | Stomach Procedures          | Open and other partial gastrectomy                                             |
| 4399  | Stomach Procedures          | Other total gastrectomy                                                        |
| 4469  | Stomach Procedures          | Other repair of stomach                                                        |
| 4342  | Stomach Procedures          | Local excision of other lesion or tissue of stomach                            |
| 4429  | Stomach Procedures          | Other pyloroplasty                                                             |
| 4466  | Stomach Procedures          | Other procedures for creation of esophagogastric sphincteric competence        |
| 4467  | Stomach Procedures          | Laparoscopic procedures for creation of esophagogastric sphincteric competence |
| 064   | Thyroid Procedures          | Complete thyroidectomy                                                         |
| 062   | Thyroid Procedures          | Unilateral thyroid lobectomy                                                   |
| 0639  | Thyroid Procedures          | Other partial thyroidectomy                                                    |
| 0650  | Thyroid Procedures          | Substernal thyroidectomy, not otherwise specified                              |
| 0651  | Thyroid Procedures          | Partial substernal thyroidectomy                                               |
| 0652  | Thyroid Procedures          | Complete substernal thyroidectomy                                              |
| 4442  | Ulcer Surgery               | Suture of duodenal ulcer site                                                  |
| 4441  | Ulcer Surgery               | Suture of gastric ulcer site                                                   |
| 5341  | Umbilical Hernia Procedures | Other and open repair of umbilical hernia with graft or prosthesis             |
| 5349  | Umbilical Hernia Procedures | Other open umbilical herniorrhaphy                                             |
| 5351  | Ventral Hernia Repair       | Incisional hernia repair                                                       |
| 5359  | Ventral Hernia Repair       | Repair of other hernia of anterior abdominal wall                              |

### Appendix 6b. Orthopedic Surgery

| ICD-9 | Procedure Group  | Procedure Name                                                     |
|-------|------------------|--------------------------------------------------------------------|
| 8156  | Ankle Procedures | Total ankle replacement                                            |
| 8005  | Arthrotomies     | Arthrotomy for removal of prosthesis without replacement, hip      |
| 8006  | Arthrotomies     | Arthrotomy for removal of prosthesis without replacement, knee     |
| 8001  | Arthrotomies     | Arthrotomy for removal of prosthesis without replacement, shoulder |

| ICD-9 | Procedure Group               | Procedure Name                                                          |
|-------|-------------------------------|-------------------------------------------------------------------------|
| 7747  | Bone Biopsies                 | Biopsy of bone, tibia and fibula                                        |
| 7805  | Bone grafts                   | Bone graft, femur                                                       |
| 7807  | Bone grafts                   | Bone graft, tibia and fibula                                            |
| 8085  | Destruction of Lesion, NEC    | Other local excision or destruction of lesion of joint, hip             |
| 8086  | Destruction of Lesion, NEC    | Other local excision or destruction of lesion of joint, knee            |
| 8081  | Destruction of Lesion, NEC    | Other local excision or destruction of lesion of joint, shoulder        |
| 8151  | Hip Procedures                | Total hip replacement                                                   |
| 8152  | Hip Procedures                | Partial hip replacement                                                 |
| 8140  | Hip Procedures                | Repair of hip, not elsewhere classified                                 |
| 0073  | Hip Procedures                | Revision of hip replacement, acetabular liner and/or femoral head only  |
| 0071  | Hip Procedures                | Revision of hip replacement, acetabular component                       |
| 0072  | Hip Procedures                | Revision of hip replacement, femoral component                          |
| 0070  | Hip Procedures                | Revision of hip replacement, both acetabular and femoral components     |
| 8153  | Hip Procedures                | Revision of hip replacement, not otherwise specified                    |
| 7855  | Internal Fixation             | Internal fixation of bone without fracture reduction, femur             |
| 7852  | Internal Fixation             | Internal fixation of bone without fracture reduction, humerus           |
| 7857  | Internal Fixation             | Internal fixation of bone without fracture reduction, tibia and fibula  |
| 8154  | Knee Procedures               | Total knee replacement                                                  |
| 806   | Knee Procedures               | Excision of semilunar cartilage of knee                                 |
| 8076  | Knee Procedures               | Synovectomy, knee                                                       |
| 8144  | Knee Procedures               | Patellar stabilization                                                  |
| 8147  | Knee Procedures               | Other repair of knee                                                    |
| 0080  | Knee Procedures               | Revision of knee replacement, total (all components)                    |
| 0083  | Knee Procedures               | Revision of knee replacement, patellar component                        |
| 8155  | Knee Procedures               | Revision of knee replacement, not otherwise specified                   |
| 0081  | Knee Procedures               | Revision of knee replacement, tibial component                          |
| 0082  | Knee Procedures               | Revision of knee replacement, femoral component                         |
| 0084  | Knee Procedures               | Revision of total knee replacement, tibial insert (liner)               |
| 7765  | Local Excision of Bone Lesion | Local excision of lesion or tissue of bone, femur                       |
| 7766  | Local Excision of Bone Lesion | Local excision of lesion or tissue of bone, patella                     |
| 7762  | Local Excision of Bone Lesion | Local excision of lesion or tissue of bone, humerus                     |
| 7763  | Local Excision of Bone Lesion | Local excision of lesion or tissue of bone, radius and ulna             |
| 7767  | Local Excision of Bone Lesion | Local excision of lesion or tissue of bone, tibia and fibula            |
| 8111  | Lower Extremity Fusions       | Ankle fusion                                                            |
| 8112  | Lower Extremity Fusions       | Triple arthrodesis                                                      |
| 8113  | Lower Extremity Fusions       | Subtalar fusion                                                         |
| 8116  | Lower Extremity Fusions       | Metatarsophalangeal fusion                                              |
| 7935  | Open Reductions               | Open reduction of fracture with internal fixation, femur                |
| 7922  | Open Reductions               | Open reduction of fracture without internal fixation, radius and ulna   |
| 7932  | Open Reductions               | Open reduction of fracture with internal fixation, radius and ulna      |
| 7921  | Open Reductions               | Open reduction of fracture without internal fixation, humerus           |
| 7931  | Open Reductions               | Open reduction of fracture with internal fixation, humerus              |
| 7926  | Open Reductions               | Open reduction of fracture without internal fixation, tibia and fibula  |
| 7936  | Open Reductions               | Open reduction of fracture with internal fixation, tibia and fibula     |
| 7939  | Open Reductions               | Open reduction of fracture with internal fixation, other specified bone |
| 8051  | Orthoscopies                  | Excision of intervertebral disc                                         |
| 8026  | Orthoscopies                  | Arthroscopy, knee                                                       |
| 7785  | Partial Osteotomies           | Other partial osteotomy, femur                                          |
| 7786  | Partial Osteotomies           | Other partial osteotomy, patella                                        |
| 7782  | Partial Osteotomies           | Other partial osteotomy, humerus                                        |
| 7787  | Partial Osteotomies           | Other partial osteotomy, tibia and fibula                               |
| 7756  | Repair of Hammer Toe          | Repair of hammer toe                                                    |

| ICD-9 | Procedure Group                    | Procedure Name                                                                  |
|-------|------------------------------------|---------------------------------------------------------------------------------|
| 7865  | Repair of Implanted Device in Bone | Removal of implanted devices from bone, femur                                   |
| 7866  | Repair of Implanted Device in Bone | Removal of implanted devices from bone, patella                                 |
| 7862  | Repair of Implanted Device in Bone | Removal of implanted devices from bone, humerus                                 |
| 7863  | Repair of Implanted Device in Bone | Removal of implanted devices from bone, radius and ulna                         |
| 7867  | Repair of Implanted Device in Bone | Removal of implanted devices from bone, tibia and fibula                        |
| 7869  | Repair of Implanted Device in Bone | Removal of implanted devices from bone, other bones                             |
| 8180  | Shoulder Procedures                | Other total shoulder replacement                                                |
| 8181  | Shoulder Procedures                | Partial shoulder replacement                                                    |
| 8183  | Shoulder Procedures                | Other repair of shoulder                                                        |
| 034   | Spinal and Vertebral Procedures    | Excision or destruction of lesion of spinal cord or spinal meninges             |
| 0353  | Spinal and Vertebral Procedures    | Repair of vertebral fracture                                                    |
| 0302  | Spinal and Vertebral Procedures    | Reopening of laminectomy site                                                   |
| 0309  | Spinal and Vertebral Procedures    | Other exploration and decompression of spinal canal                             |
| 8106  | Spinal Fusions                     | Lumbar and lumbosacral fusion of the anterior column, anterior technique        |
| 8107  | Spinal Fusions                     | Lumbar and lumbosacral fusion of the posterior column, posterior technique      |
| 8108  | Spinal Fusions                     | Lumbar and lumbosacral fusion of the anterior column, posterior technique       |
| 8101  | Spinal Fusions                     | Atlas-axis spinal fusion                                                        |
| 8102  | Spinal Fusions                     | Other cervical fusion of the anterior column, anterior technique                |
| 8103  | Spinal Fusions                     | Other cervical fusion of the posterior column, posterior technique              |
| 8104  | Spinal Fusions                     | Dorsal and dorsolumbar fusion of the anterior column, anterior technique        |
| 8105  | Spinal Fusions                     | Dorsal and dorsolumbar fusion of the posterior column, posterior technique      |
| 8132  | Spinal Refusions                   | Refusion of other cervical spine, anterior column, anterior technique           |
| 8133  | Spinal Refusions                   | Refusion of other cervical spine, posterior column, posterior technique         |
| 8134  | Spinal Refusions                   | Refusion of dorsal and dorsolumbar spine, anterior column, anterior technique   |
| 8135  | Spinal Refusions                   | Refusion of dorsal and dorsolumbar spine, posterior column, posterior technique |
| 8136  | Spinal Refusions                   | Refusion of lumbar and lumbosacral spine, anterior column, anterior technique   |
| 8137  | Spinal Refusions                   | Refusion of lumbar and lumbosacral spine, posterior column, posterior technique |
| 8138  | Spinal Refusions                   | Refusion of lumbar and lumbosacral spine, anterior column, posterior technique  |
| 8364  | Suture of Tendon                   | Other suture of tendon                                                          |
| 7796  | Total Osteotomies                  | Total osteotomy, patella                                                        |
| 7797  | Total Osteotomies                  | Total osteotomy, tibia and fibula                                               |
| 8197  | Upper Extremity Procedures         | Revision of joint replacement of upper extremity                                |
| 8184  | Upper Extremity Procedures         | Total elbow replacement                                                         |

| ICD-9 | Procedure Group            | Procedure Name        |
|-------|----------------------------|-----------------------|
| 8185  | Upper Extremity Procedures | Other repair of elbow |
| 835   | Upper Extremity Procedures | Bursectomy            |
| 8363  | Upper Extremity Procedures | Rotator cuff repair   |

### Appendix 6c. Vascular Surgery

| ICD-9 | Procedure Group                      | Procedure Name                                                          |
|-------|--------------------------------------|-------------------------------------------------------------------------|
| 3926  | Aortic-distal Bypass                 | Other intra-abdominal vascular shunt or bypass                          |
| 3922  | Aortic-distal Bypass                 | Aorta-subclavian-carotid bypass                                         |
| 3924  | Aortic-distal Bypass                 | Aorta-renal bypass                                                      |
| 3925  | Aortic-distal Bypass                 | Aorta-iliac-femoral bypass                                              |
| 3803  | Artery Incisions                     | Incision of vessel, upper limb vessels                                  |
| 3808  | Artery Incisions                     | Incision of vessel, lower limb arteries                                 |
| 3802  | Artery Incisions                     | Incision of vessel, other vessels of head and neck                      |
| 3806  | Artery Incisions                     | Incision of vessel, abdominal arteries                                  |
| 3953  | AV Fistula Repair                    | Repair of arteriovenous fistula                                         |
| 8415  | Below-Knee Amputation                | Other amputation below knee                                             |
| 3927  | Dialysis Access                      | Arteriovenostomy for renal dialysis                                     |
| 3942  | Dialysis Access                      | Revision of arteriovenous shunt for renal dialysis                      |
| 3943  | Dialysis Access                      | Removal of arteriovenous shunt for renal dialysis                       |
| 3929  | Distal Bypass Procedure              | Other (peripheral) vascular shunt or bypass                             |
| 3812  | Endarterectomies                     | Endarterectomy, other vessels of head and neck                          |
| 3810  | Endarterectomies                     | Endarterectomy, unspecified site                                        |
| 3813  | Endarterectomies                     | Endarterectomy, upper limb vessels                                      |
| 3818  | Endarterectomies                     | Endarterectomy, lower limb arteries                                     |
| 3814  | Endarterectomies                     | Endarterectomy, aorta                                                   |
| 3815  | Endarterectomies                     | Endarterectomy, other thoracic vessels                                  |
| 3816  | Endarterectomies                     | Endarterectomy, abdominal arteries                                      |
| 3971  | Endovascular Vessel Repair (AAA)     | Endovascular implantation of other graft in abdominal aorta             |
| 3978  | Endovascular Vessel Repair (AAA)     | Endovascular implantation of branching or fenestrated graft(s) in aorta |
| 3979  | Endovascular Vessel Repair (AAA)     | Other endovascular procedures on other vessels                          |
| 3974  | Endovascular Vessel Repair (non-AAA) | Endovascular removal of obstruction from head and neck vessel(s)        |
| 3972  | Endovascular Vessel Repair (non-AAA) | Endovascular (total) embolization or occlusion of head and neck vessels |
| 391   | Intra-abdominal Venous Shunt         | Intra-abdominal venous shunt                                            |
| 3956  | Repair of Blood Vessel               | Repair of blood vessel with tissue patch graft                          |
| 3957  | Repair of Blood Vessel               | Repair of blood vessel with synthetic patch graft                       |
| 3958  | Repair of Blood Vessel               | Repair of blood vessel with unspecified type of patch graft             |
| 0061  | Stenting Procedures                  | Percutaneous angioplasty of extracranial vessel(s)                      |
| 0063  | Stenting Procedures                  | Percutaneous insertion of carotid artery stent(s)                       |

| <b>ICD-9</b> | <b>Procedure Group</b>                                    | <b>Procedure Name</b>                                                |
|--------------|-----------------------------------------------------------|----------------------------------------------------------------------|
| 3949         | Vascular, Other                                           | Other revision of vascular procedure                                 |
| 3863         | Vessel Excision (non-AAA)                                 | Other excision of vessels, upper limb vessels                        |
| 3868         | Vessel Excision (non-AAA)                                 | Other excision of vessels, lower limb arteries                       |
| 3834         | Vessel Resection and Anastomosis or Replacement (AAA)     | Resection of vessel with anastomosis, aorta                          |
| 3844         | Vessel Resection and Anastomosis or Replacement (AAA)     | Resection of vessel with replacement, aorta, abdominal               |
| 3832         | Vessel Resection and Anastomosis or Replacement (non-AAA) | Resection of vessel with anastomosis, other vessels of head and neck |
| 3842         | Vessel Resection and Anastomosis or Replacement (non-AAA) | Resection of vessel with replacement, other vessels of head and neck |
| 3846         | Vessel Resection and Anastomosis or Replacement (non-AAA) | Resection of vessel with replacement, abdominal arteries             |
| 3833         | Vessel Resection and Anastomosis or Replacement (non-AAA) | Resection of vessel with anastomosis, upper limb vessels             |
| 3848         | Vessel Resection and Anastomosis or Replacement (non-AAA) | Resection of vessel with replacement, lower limb arteries            |

**Appendix 7. Complete Matching Results with All Variables**

| Variable<br>(Percent unless noted)                          | All Focal<br>Cases | Matched<br>Focal Cases | Matched<br>Controls | All<br>Controls | Standardized<br>Difference<br>before Match | P-<br>value | Standardized<br>Difference after<br>Match | P-<br>value |
|-------------------------------------------------------------|--------------------|------------------------|---------------------|-----------------|--------------------------------------------|-------------|-------------------------------------------|-------------|
| Number of Patients                                          | 87,847             | 62,715                 | 62,715              | 212,683         |                                            |             |                                           |             |
| Age (years, mean)                                           | 75.7               | 76.3                   | 76.4                | 76.8            | -0.14                                      | <.0001      | -0.01                                     | 0.0065      |
| Age 65-69                                                   | 25.0               | 23.4                   | 23.0                | 20.9            | 0.10                                       | <.0001      | 0.01                                      | 0.1254      |
| Age 70-74                                                   | 25.2               | 24.0                   | 23.5                | 23.0            | 0.05                                       | <.0001      | 0.01                                      | 0.0236      |
| Age 75-79                                                   | 20.4               | 20.1                   | 20.3                | 20.7            | -0.01                                      | 0.0232      | -0.01                                     | 0.3081      |
| Age 80-84                                                   | 14.7               | 15.6                   | 16.1                | 16.8            | -0.06                                      | <.0001      | -0.01                                     | 0.0496      |
| Age 85+                                                     | 14.8               | 16.9                   | 17.2                | 18.5            | -0.10                                      | <.0001      | -0.01                                     | 0.2015      |
| Race (% non-Hispanic white)                                 | 78.6               | 80.2                   | 81.7                | 89.6            | -0.30                                      | <.0001      | -0.04                                     | <.0001      |
| Race (% Black)                                              | 4.9                | 3.9                    | 4.7                 | 3.4             | 0.08                                       | <.0001      | -0.04                                     | <.0001      |
| Race (% Hispanic)                                           | 9.2                | 9.8                    | 8.6                 | 4.6             | 0.18                                       | <.0001      | 0.05                                      | <.0001      |
| Race (% other)                                              | 7.2                | 6.1                    | 5.1                 | 2.4             | 0.23                                       | <.0001      | 0.05                                      | <.0001      |
| Dual Eligible status                                        | 17.2               | 17.0                   | 15.8                | 13.2            | 0.11                                       | <.0001      | 0.03                                      | <.0001      |
| Sex (% male)                                                | 41.9               | 41.2                   | 41.2                | 41.2            | 0.01                                       | 0.0005      | 0.00                                      | 0.9771      |
| Probability of 30-day death                                 | 2.7                | 2.9                    | 2.8                 | 3.2             | -0.08                                      | <.0001      | 0.01                                      | 0.5670      |
| Predicted ICU or Intermediate Care Utilization<br>(mean)    | 29.8               | 29.5                   | 29.4                | 30.4            | -0.02                                      | <.0001      | 0.00                                      | 0.3461      |
| Predicted LOS (mean)                                        | 4.2                | 4.3                    | 4.3                 | 4.4             | -0.08                                      | <.0001      | 0.00                                      | 0.5407      |
| Predicted Cost (\$, mean)                                   | 1,9687             | 1,9336                 | 1,9277              | 1,9673          | 0.00                                       | <.0001      | 0.01                                      | 0.0740      |
| 30-Day Mortality Risk Quintile 1                            | 20.4               | 20.3                   | 20.3                | 19.8            | 0.01                                       | 0.0005      | 0.00                                      | 1.0000      |
| 30-Day Mortality Risk Quintile 2                            | 20.6               | 20.0                   | 20.0                | 19.7            | 0.02                                       | <.0001      | 0.00                                      | 1.0000      |
| 30-Day Mortality Risk Quintile 3                            | 21.4               | 20.3                   | 20.3                | 19.4            | 0.05                                       | <.0001      | 0.00                                      | 1.0000      |
| 30-Day Mortality Risk Quintile 4                            | 20.1               | 20.1                   | 20.1                | 20.0            | 0.00                                       | 0.6197      | 0.00                                      | 1.0000      |
| 30-Day Mortality Risk Quintile 5                            | 17.5               | 19.2                   | 19.2                | 21.0            | -0.09                                      | <.0001      | 0.00                                      | 1.0000      |
| Emergent admission                                          | 24.6               | 28.0                   | 28.6                | 34.3            | -0.21                                      | <.0001      | -0.01                                     | 0.0287      |
| Transfer-in                                                 | 0.4                | 0.5                    | 0.6                 | 0.9             | -0.06                                      | <.0001      | -0.02                                     | 0.0033      |
| Transfer-in from another hospital's emergency<br>department | 1.5                | 1.8                    | 1.4                 | 1.9             | -0.03                                      | <.0001      | 0.03                                      | <.0001      |
| Major Secondary Procedure                                   | 35.1               | 31.2                   | 30.9                | 29.0            | 0.13                                       | <.0001      | 0.01                                      | 0.3506      |
| Comorbidities                                               |                    |                        |                     |                 |                                            |             |                                           |             |
| Congestive Heart Failure                                    | 15.3               | 15.7                   | 15.3                | 16.3            | -0.02                                      | <.0001      | 0.01                                      | 0.0473      |
| Past Myocardial Infarction                                  | 8.9                | 8.9                    | 9.1                 | 10.3            | -0.05                                      | <.0001      | -0.01                                     | 0.1314      |
| Past Arrhythmia                                             | 30.2               | 29.9                   | 29.7                | 31.3            | -0.02                                      | <.0001      | 0.00                                      | 0.5452      |
| Angina                                                      | 4.3                | 4.3                    | 4.1                 | 5.8             | -0.07                                      | <.0001      | 0.01                                      | 0.1102      |
| Valvular Disease                                            | 22.7               | 22.8                   | 23.1                | 26.3            | -0.08                                      | <.0001      | -0.01                                     | 0.1547      |
| Unstable Angina                                             | 1.5                | 1.6                    | 1.3                 | 1.8             | -0.03                                      | <.0001      | 0.02                                      | 0.0004      |
| Hypertension                                                | 83.5               | 85.0                   | 85.8                | 87.4            | -0.11                                      | <.0001      | -0.02                                     | 0.0001      |



| Variable<br>(Percent unless noted)   | All Focal<br>Cases | Matched<br>Focal Cases | Matched<br>Controls | All<br>Controls | Standardized<br>Difference<br>before Match | P-<br>value | Standardized<br>Difference after<br>Match | P-<br>value |
|--------------------------------------|--------------------|------------------------|---------------------|-----------------|--------------------------------------------|-------------|-------------------------------------------|-------------|
| Diabetes                             | 32.4               | 33.0                   | 33.4                | 34.4            | -0.04                                      | <.0001      | -0.01                                     | 0.1094      |
| Renal Dysfunction                    | 21.2               | 22.5                   | 22.4                | 22.5            | -0.03                                      | <.0001      | 0.00                                      | 0.7097      |
| Renal Failure                        | 5.6                | 5.7                    | 5.2                 | 5.1             | 0.02                                       | <.0001      | 0.02                                      | 0.0005      |
| Liver Disease                        | 10.5               | 9.5                    | 8.7                 | 8.4             | 0.07                                       | <.0001      | 0.03                                      | <.0001      |
| Cancer                               | 37.4               | 35.3                   | 35.1                | 36.6            | 0.02                                       | <.0001      | 0.01                                      | 0.2981      |
| Abdominal Cancer                     | 2.8                | 1.8                    | 1.5                 | 1.2             | 0.11                                       | <.0001      | 0.02                                      | 0.0002      |
| Dementia                             | 11.1               | 12.6                   | 12.7                | 13.8            | -0.08                                      | <.0001      | 0.00                                      | 0.9188      |
| Stroke                               | 14.1               | 14.5                   | 14.3                | 15.3            | -0.03                                      | <.0001      | 0.01                                      | 0.3513      |
| Seizure                              | 2.0                | 2.0                    | 1.9                 | 2.2             | -0.01                                      | 0.0021      | 0.00                                      | 0.4384      |
| Paraplegia                           | 2.7                | 2.7                    | 2.4                 | 2.4             | 0.02                                       | <.0001      | 0.02                                      | <.0001      |
| COPD                                 | 20.2               | 21.3                   | 21.9                | 25.6            | -0.13                                      | <.0001      | -0.02                                     | 0.0037      |
| Asthma                               | 11.4               | 10.9                   | 10.2                | 10.4            | 0.03                                       | <.0001      | 0.02                                      | <.0001      |
| Post-Inflammatory Pulmonary Fibrosis | 2.6                | 2.7                    | 2.4                 | 2.7             | 0.00                                       | 0.2692      | 0.02                                      | 0.0001      |
| Hypothyroidism                       | 27.3               | 27.7                   | 26.3                | 28.3            | -0.02                                      | <.0001      | 0.03                                      | <.0001      |
| Thrombocytopenia                     | 3.1                | 3.0                    | 2.5                 | 2.8             | 0.02                                       | <.0001      | 0.03                                      | <.0001      |
| Collagen Vascular Disease            | 9.1                | 8.7                    | 9.1                 | 10.0            | -0.03                                      | <.0001      | -0.01                                     | 0.0109      |
| AIDS                                 | 0.2                | 0.2                    | 0.1                 | 0.1             | 0.02                                       | <.0001      | 0.01                                      | 0.0122      |
| Chronic Peptic Ulcer                 | 0.2                | 0.2                    | 0.1                 | 0.1             | 0.00                                       | 0.4346      | 0.01                                      | 0.1516      |
| Coagulopathy                         | 0.8                | 0.8                    | 0.7                 | 1.0             | -0.02                                      | <.0001      | 0.01                                      | 0.0060      |
| Other Coagulopathy                   | 5.2                | 5.0                    | 4.0                 | 5.1             | 0.00                                       | 0.4307      | 0.04                                      | <.0001      |
| Cushings' Disease                    | 0.1                | 0.1                    | 0.1                 | 0.1             | 0.01                                       | 0.0203      | 0.00                                      | 0.4504      |
| Graves' Disease                      | 0.4                | 0.4                    | 0.3                 | 0.3             | 0.01                                       | 0.0020      | 0.00                                      | 0.6667      |
| Hemoglobin Disorder                  | 0.0                | 0.0                    | 0.0                 | 0.0             | 0.00                                       | 0.8085      | 0.00                                      | 0.5966      |
| Weightloss                           | 9.9                | 9.6                    | 9.3                 | 9.7             | 0.01                                       | 0.0315      | 0.01                                      | 0.0559      |
| Hospital Characteristics             |                    |                        |                     |                 |                                            |             |                                           |             |
| Large (%)                            | 78.0               | 73.4                   | 73.4                | 59.1            | 0.42                                       | <.0001      | 0.00                                      | 1.0000      |
| Small (%)                            | 22.0               | 26.6                   | 26.6                | 40.9            | -0.42                                      | <.0001      | 0.00                                      | 1.0000      |
| < 100 beds (%)                       | 1.0                | 1.2                    | 1.0                 | 3.9             | -0.19                                      | <.0001      | 0.01                                      | 0.0003      |
| 100-249 beds (%)                     | 21.0               | 25.4                   | 25.6                | 37.1            | -0.36                                      | <.0001      | 0.00                                      | 0.3891      |
| 250-499 beds (%)                     | 39.8               | 45.4                   | 46.2                | 43.5            | -0.08                                      | <.0001      | -0.02                                     | 0.0041      |
| 500+ beds (%)                        | 38.2               | 28.0                   | 27.2                | 15.6            | 0.53                                       | <.0001      | 0.02                                      | 0.0014      |
| Beds (mean)                          | 460.4              | 407.2                  | 381.2               | 317.3           | 0.69                                       | <.0001      | 0.12                                      | <.0001      |
| Major teaching (%)                   | 39.7               | 17.9                   | 17.9                | 6.6             | 0.85                                       | <.0001      | 0.00                                      | 1.0000      |
| Minor teaching (%)                   | 18.2               | 25.0                   | 25.0                | 29.5            | -0.27                                      | <.0001      | 0.00                                      | 1.0000      |
| Nonteaching (%)                      | 42.1               | 57.0                   | 57.0                | 63.8            | -0.45                                      | <.0001      | 0.00                                      | 1.0000      |
| Resident to bed ratio (mean)         | 0.3                | 0.1                    | 0.1                 | 0.1             | 0.82                                       | <.0001      | 0.08                                      | <.0001      |
| High technology status               | 87.7               | 85.2                   | 85.2                | 52.3            | 0.84                                       | <.0001      | 0.00                                      | 1.0000      |

| Variable<br>(Percent unless noted)                                                                             | All Focal<br>Cases | Matched<br>Focal Cases | Matched<br>Controls | All<br>Controls | Standardized<br>Difference<br>before Match | P-<br>value | Standardized<br>Difference after<br>Match | P-<br>value |
|----------------------------------------------------------------------------------------------------------------|--------------------|------------------------|---------------------|-----------------|--------------------------------------------|-------------|-------------------------------------------|-------------|
| Principal Procedures                                                                                           |                    |                        |                     |                 |                                            |             |                                           |             |
| Unilateral thyroid lobectomy (062)                                                                             | 0.1                | 0.1                    | 0.1                 | 0.1             | 0.01                                       | 0.0037      | 0.00                                      | 1.0000      |
| Excision of lesion of thyroid (0631)                                                                           | ---                | ---                    | ---                 | ---             | 0.00                                       | 0.3173      | 0.00                                      | 1.0000      |
| Other partial thyroidectomy (0639)                                                                             | 0.0                | 0.0                    | 0.0                 | 0.0             | 0.01                                       | 0.0341      | 0.00                                      | 1.0000      |
| Complete thyroidectomy (064)                                                                                   | 0.4                | 0.3                    | 0.3                 | 0.2             | 0.05                                       | <.0001      | 0.00                                      | 1.0000      |
| Substernal thyroidectomy, not otherwise specified (0650)                                                       | ---                | ---                    | ---                 | ---             | 0.00                                       | 1.0000      | 0.00                                      | 1.0000      |
| Partial substernal thyroidectomy (0651)                                                                        | 0.0                | ---                    | ---                 | 0.0             | 0.01                                       | 0.0014      | 0.00                                      | 1.0000      |
| Complete substernal thyroidectomy (0652)                                                                       | 0.0                | ---                    | ---                 | 0.0             | 0.01                                       | 0.0006      | 0.00                                      | 1.0000      |
| Complete parathyroidectomy (0681)                                                                              | 0.0                | ---                    | ---                 | 0.0             | 0.01                                       | 0.0080      | 0.00                                      | 1.0000      |
| Other parathyroidectomy (0689)                                                                                 | 0.2                | 0.2                    | 0.2                 | 0.1             | 0.03                                       | <.0001      | 0.00                                      | 1.0000      |
| Unilateral adrenalectomy (0722)                                                                                | 0.2                | 0.1                    | 0.1                 | 0.0             | 0.04                                       | <.0001      | 0.00                                      | 1.0000      |
| Other partial adrenalectomy (0729)                                                                             | ---                | ---                    | ---                 | ---             | 0.01                                       | 0.0097      | 0.00                                      | 1.0000      |
| Bilateral adrenalectomy (073)                                                                                  | ---                | ---                    | ---                 | ---             | 0.00                                       | 1.0000      | 0.00                                      | 1.0000      |
| Laparoscopic repair of direct inguinal hernia with graft or prosthesis (1711)                                  | 0.0                | ---                    | ---                 | 0.0             | 0.01                                       | 0.0464      | 0.00                                      | 1.0000      |
| Laparoscopic repair of indirect inguinal hernia with graft or prosthesis (1712)                                | 0.0                | 0.0                    | 0.0                 | 0.0             | 0.01                                       | 0.0820      | 0.00                                      | 1.0000      |
| Laparoscopic repair of inguinal hernia with graft or prosthesis, not otherwise specified (1713)                | 0.0                | 0.0                    | 0.0                 | 0.0             | -0.01                                      | 0.0833      | 0.00                                      | 1.0000      |
| Laparoscopic bilateral repair of direct inguinal hernia with graft or prosthesis (1721)                        | ---                | ---                    | ---                 | ---             | -0.01                                      | 0.0518      | 0.00                                      | 1.0000      |
| Laparoscopic bilateral repair of indirect inguinal hernia with graft or prosthesis (1722)                      | ---                | ---                    | ---                 | ---             | 0.01                                       | 0.0497      | 0.00                                      | 1.0000      |
| Laparoscopic bilateral repair of inguinal hernia, one direct and one indirect, with graft or prosthesis (1723) | ---                | ---                    | ---                 | ---             | 0.00                                       | 0.4365      | 0.00                                      | 1.0000      |
| Laparoscopic bilateral repair of inguinal hernia with graft or prosthesis, not otherwise specified (1724)      | ---                | ---                    | ---                 | ---             | 0.00                                       | 0.4365      | 0.00                                      | 1.0000      |
| Laparoscopic multiple segmental resection of large intestine (1731)                                            | ---                | ---                    | ---                 | ---             | 0.00                                       | 0.2712      | 0.00                                      | 1.0000      |
| Laparoscopic cecectomy (1732)                                                                                  | 0.1                | 0.1                    | 0.1                 | 0.1             | 0.00                                       | 0.5392      | 0.00                                      | 1.0000      |
| Laparoscopic right hemicolectomy (1733)                                                                        | 1.2                | 1.1                    | 1.1                 | 1.0             | 0.02                                       | <.0001      | 0.00                                      | 1.0000      |
| Laparoscopic resection of transverse colon (1734)                                                              | 0.1                | 0.1                    | 0.1                 | 0.1             | 0.00                                       | 0.3814      | 0.00                                      | 1.0000      |
| Laparoscopic left hemicolectomy (1735)                                                                         | 0.2                | 0.2                    | 0.2                 | 0.2             | 0.01                                       | 0.0046      | 0.00                                      | 1.0000      |
| Laparoscopic sigmoidectomy (1736)                                                                              | 0.6                | 0.6                    | 0.6                 | 0.5             | 0.01                                       | 0.0942      | 0.00                                      | 1.0000      |

| Variable<br>(Percent unless noted)                                                    | All Focal<br>Cases | Matched<br>Focal Cases | Matched<br>Controls | All<br>Controls | Standardized<br>Difference<br>before Match | P-<br>value | Standardized<br>Difference after<br>Match | P-<br>value |
|---------------------------------------------------------------------------------------|--------------------|------------------------|---------------------|-----------------|--------------------------------------------|-------------|-------------------------------------------|-------------|
| Other laparoscopic partial excision of large intestine (1739)                         | 0.0                | 0.0                    | 0.0                 | 0.1             | -0.01                                      | 0.2265      | 0.00                                      | 1.0000      |
| Total splenectomy (415)                                                               | 0.2                | 0.1                    | 0.1                 | 0.1             | 0.01                                       | 0.0030      | 0.00                                      | 1.0000      |
| Esophagectomy, not otherwise specified (4240)                                         | 0.0                | ---                    | ---                 | 0.0             | 0.01                                       | 0.0211      | 0.00                                      | 1.0000      |
| Partial esophagectomy (4241)                                                          | 0.1                | 0.1                    | 0.1                 | 0.0             | 0.03                                       | <.0001      | 0.00                                      | 1.0000      |
| Total esophagectomy (4242)                                                            | 0.1                | ---                    | ---                 | 0.0             | 0.04                                       | <.0001      | 0.00                                      | 1.0000      |
| Esophagomyotomy (427)                                                                 | 0.1                | 0.0                    | 0.0                 | 0.0             | 0.04                                       | <.0001      | 0.00                                      | 1.0000      |
| Local excision of other lesion or tissue of stomach (4342)                            | 0.1                | 0.0                    | 0.0                 | 0.0             | 0.01                                       | 0.0004      | 0.00                                      | 1.0000      |
| Partial gastrectomy with anastomosis to esophagus (435)                               | 0.0                | 0.0                    | 0.0                 | 0.0             | 0.01                                       | 0.0299      | 0.00                                      | 1.0000      |
| Partial gastrectomy with anastomosis to duodenum (436)                                | 0.0                | ---                    | ---                 | 0.0             | -0.01                                      | 0.1874      | 0.00                                      | 1.0000      |
| Partial gastrectomy with anastomosis to jejunum (437)                                 | 0.2                | 0.2                    | 0.2                 | 0.2             | 0.01                                       | 0.0016      | 0.00                                      | 1.0000      |
| Open and other partial gastrectomy (4389)                                             | 0.1                | 0.1                    | 0.1                 | 0.1             | 0.01                                       | 0.0018      | 0.00                                      | 1.0000      |
| Other total gastrectomy (4399)                                                        | 0.2                | 0.1                    | 0.1                 | 0.0             | 0.03                                       | <.0001      | 0.00                                      | 1.0000      |
| Other pyloroplasty (4429)                                                             | 0.0                | 0.0                    | 0.0                 | 0.0             | 0.00                                       | 1.0000      | 0.00                                      | 1.0000      |
| Laparoscopic gastroenterostomy (4438)                                                 | 0.2                | 0.2                    | 0.2                 | 0.2             | 0.01                                       | 0.0010      | 0.00                                      | 1.0000      |
| Other gastroenterostomy without gastrectomy (4439)                                    | 0.1                | 0.1                    | 0.1                 | 0.1             | 0.00                                       | 0.5960      | 0.00                                      | 1.0000      |
| Suture of gastric ulcer site (4441)                                                   | 0.1                | 0.1                    | 0.1                 | 0.1             | -0.01                                      | 0.0040      | 0.00                                      | 1.0000      |
| Suture of duodenal ulcer site (4442)                                                  | 0.2                | 0.2                    | 0.2                 | 0.2             | -0.01                                      | 0.0009      | 0.00                                      | 1.0000      |
| Other procedures for creation of esophagogastric sphincteric competence (4466)        | 0.1                | 0.0                    | 0.0                 | 0.0             | 0.01                                       | 0.0811      | 0.00                                      | 1.0000      |
| Laparoscopic procedures for creation of esophagogastric sphincteric competence (4467) | 0.4                | 0.4                    | 0.4                 | 0.2             | 0.04                                       | <.0001      | 0.00                                      | 1.0000      |
| Other repair of stomach (4469)                                                        | 0.0                | 0.0                    | 0.0                 | 0.0             | 0.01                                       | 0.1839      | 0.00                                      | 1.0000      |
| Multiple segmental resection of small intestine (4561)                                | 0.1                | 0.1                    | 0.1                 | 0.1             | 0.00                                       | 0.5490      | 0.00                                      | 1.0000      |
| Other partial resection of small intestine (4562)                                     | 1.2                | 1.3                    | 1.3                 | 1.3             | -0.01                                      | 0.0404      | 0.00                                      | 1.0000      |
| Total removal of small intestine (4563)                                               | ---                | ---                    | ---                 | ---             | 0.01                                       | 0.1931      | 0.00                                      | 1.0000      |
| Open and other multiple segmental resection of large intestine (4571)                 | 0.0                | 0.0                    | 0.0                 | 0.0             | -0.01                                      | 0.0428      | 0.00                                      | 1.0000      |
| Open and other cecectomy (4572)                                                       | 0.1                | 0.1                    | 0.1                 | 0.1             | 0.00                                       | 0.3138      | 0.00                                      | 1.0000      |
| Open and other right hemicolectomy (4573)                                             | 1.2                | 1.5                    | 1.5                 | 1.7             | -0.04                                      | <.0001      | 0.00                                      | 1.0000      |
| Open and other resection of transverse colon (4574)                                   | 0.1                | 0.2                    | 0.2                 | 0.2             | -0.02                                      | <.0001      | 0.00                                      | 1.0000      |

| Variable<br>(Percent unless noted)                               | All Focal<br>Cases | Matched<br>Focal Cases | Matched<br>Controls | All<br>Controls | Standardized<br>Difference<br>before Match | P-<br>value | Standardized<br>Difference after<br>Match | P-<br>value |
|------------------------------------------------------------------|--------------------|------------------------|---------------------|-----------------|--------------------------------------------|-------------|-------------------------------------------|-------------|
| Open and other left hemicolectomy (4575)                         | 0.4                | 0.4                    | 0.4                 | 0.5             | -0.03                                      | <.0001      | 0.00                                      | 1.0000      |
| Open and other sigmoidectomy (4576)                              | 0.9                | 1.1                    | 1.1                 | 1.3             | -0.04                                      | <.0001      | 0.00                                      | 1.0000      |
| Other and unspecified partial excision of large intestine (4579) | 0.2                | 0.2                    | 0.2                 | 0.2             | -0.01                                      | 0.2012      | 0.00                                      | 1.0000      |
| Laparoscopic total intra-abdominal colectomy (4581)              | 0.1                | 0.0                    | 0.0                 | 0.0             | 0.02                                       | <.0001      | 0.00                                      | 1.0000      |
| Open total intra-abdominal colectomy (4582)                      | 0.1                | 0.1                    | 0.1                 | 0.1             | 0.00                                       | 0.3456      | 0.00                                      | 1.0000      |
| Other and unspecified total intra-abdominal colectomy (4583)     | 0.0                | 0.0                    | 0.0                 | 0.0             | 0.01                                       | 0.0171      | 0.00                                      | 1.0000      |
| Intestinal anastomosis, not otherwise specified (4590)           | ---*               | ---*                   | ---*                | ---*            | 0.00                                       | 0.4628      | 0.00                                      | 1.0000      |
| Small-to-small intestinal anastomosis (4591)                     | 0.0                | ---*                   | ---*                | 0.0             | 0.00                                       | 0.3818      | 0.00                                      | 1.0000      |
| Anastomosis of small intestine to rectal stump (4592)            | ---*               | ---*                   | ---*                | ---*            | 0.00                                       | 1.0000      | 0.00                                      | 1.0000      |
| Other small-to-large intestinal anastomosis (4593)               | 0.1                | 0.1                    | 0.1                 | 0.1             | 0.01                                       | 0.1172      | 0.00                                      | 1.0000      |
| Large-to-large intestinal anastomosis (4594)                     | 0.1                | 0.0                    | 0.0                 | 0.1             | 0.00                                       | 1.0000      | 0.00                                      | 1.0000      |
| Anastomosis to anus (4595)                                       | ---*               | ---*                   | ---*                | ---*            | 0.01                                       | 0.0567      | 0.00                                      | 1.0000      |
| Exteriorization of small intestine (4601)                        | 0.1                | 0.1                    | 0.1                 | 0.0             | 0.01                                       | 0.0720      | 0.00                                      | 1.0000      |
| Exteriorization of large intestine (4603)                        | 0.1                | 0.2                    | 0.2                 | 0.2             | -0.01                                      | 0.0034      | 0.00                                      | 1.0000      |
| Colostomy, not otherwise specified (4610)                        | 0.1                | 0.2                    | 0.2                 | 0.2             | -0.01                                      | 0.0226      | 0.00                                      | 1.0000      |
| Temporary colostomy (4611)                                       | ---*               | ---*                   | ---*                | ---*            | -0.01                                      | 0.0448      | 0.00                                      | 1.0000      |
| Permanent colostomy (4613)                                       | 0.0                | ---*                   | ---*                | 0.0             | 0.00                                       | 0.6109      | 0.00                                      | 1.0000      |
| Ileostomy, not otherwise specified (4620)                        | 0.0                | ---*                   | ---*                | 0.0             | 0.00                                       | 0.7180      | 0.00                                      | 1.0000      |
| Temporary ileostomy (4621)                                       | ---*               | ---*                   | ---*                | ---*            | 0.01                                       | 0.1531      | 0.00                                      | 1.0000      |
| Other permanent ileostomy (4623)                                 | ---*               | ---*                   | ---*                | ---*            | 0.00                                       | 0.3488      | 0.00                                      | 1.0000      |
| Other enterostomy (4639)                                         | 0.1                | 0.1                    | 0.1                 | 0.1             | 0.00                                       | 0.3382      | 0.00                                      | 1.0000      |
| Repair of pericostomy hernia (4642)                              | 0.1                | 0.1                    | 0.1                 | 0.1             | 0.01                                       | 0.0162      | 0.00                                      | 1.0000      |
| Closure of stoma of small intestine (4651)                       | 0.2                | 0.1                    | 0.1                 | 0.1             | 0.03                                       | <.0001      | 0.00                                      | 1.0000      |
| Closure of stoma of large intestine (4652)                       | 0.2                | 0.2                    | 0.2                 | 0.2             | 0.01                                       | 0.0109      | 0.00                                      | 1.0000      |
| Suture of laceration of small intestine, except duodenum (4673)  | 0.0                | 0.0                    | 0.0                 | 0.0             | -0.01                                      | 0.2296      | 0.00                                      | 1.0000      |
| Closure of fistula of small intestine, except duodenum (4674)    | 0.1                | 0.0                    | 0.0                 | 0.0             | 0.02                                       | <.0001      | 0.00                                      | 1.0000      |
| Suture of laceration of large intestine (4675)                   | 0.0                | 0.0                    | 0.0                 | 0.0             | 0.00                                       | 0.6448      | 0.00                                      | 1.0000      |
| Other repair of intestine (4679)                                 | 0.0                | ---*                   | ---*                | 0.0             | 0.00                                       | 0.8789      | 0.00                                      | 1.0000      |
| Laparoscopic appendectomy (4701)                                 | 0.9                | 1.0                    | 1.0                 | 1.1             | -0.02                                      | <.0001      | 0.00                                      | 1.0000      |
| Other appendectomy (4709)                                        | 0.2                | 0.2                    | 0.2                 | 0.3             | -0.02                                      | <.0001      | 0.00                                      | 1.0000      |

| Variable<br>(Percent unless noted)                                       | All Focal<br>Cases | Matched<br>Focal Cases | Matched<br>Controls | All<br>Controls | Standardized<br>Difference<br>before Match | P-<br>value | Standardized<br>Difference after<br>Match | P-<br>value |
|--------------------------------------------------------------------------|--------------------|------------------------|---------------------|-----------------|--------------------------------------------|-------------|-------------------------------------------|-------------|
| Other pull-through resection of rectum (4849)                            | 0.0                | 0.0                    | 0.0                 | 0.0             | 0.01                                       | 0.0240      | 0.00                                      | 1.0000      |
| Abdominoperineal resection of the rectum, not otherwise specified (4850) | ---*               | ---*                   | ---*                | ---*            | -0.01                                      | 0.1155      | 0.00                                      | 1.0000      |
| Laparoscopic abdominoperineal resection of the rectum (4851)             | 0.1                | 0.0                    | 0.0                 | 0.0             | 0.01                                       | 0.0001      | 0.00                                      | 1.0000      |
| Open abdominoperineal resection of the rectum (4852)                     | 0.1                | 0.1                    | 0.1                 | 0.1             | 0.02                                       | 0.0001      | 0.00                                      | 1.0000      |
| Other abdominoperineal resection of the rectum (4859)                    | ---*               | ---*                   | ---*                | ---*            | 0.00                                       | 0.7676      | 0.00                                      | 1.0000      |
| Anterior resection of rectum with synchronous colostomy (4862)           | 0.1                | 0.1                    | 0.1                 | 0.1             | 0.00                                       | 0.5876      | 0.00                                      | 1.0000      |
| Other anterior resection of rectum (4863)                                | 0.5                | 0.5                    | 0.5                 | 0.4             | 0.01                                       | 0.0038      | 0.00                                      | 1.0000      |
| Other resection of rectum (4869)                                         | 0.2                | 0.1                    | 0.1                 | 0.1             | 0.02                                       | <.0001      | 0.00                                      | 1.0000      |
| Abdominal proctopexy (4875)                                              | 0.1                | 0.1                    | 0.1                 | 0.0             | 0.02                                       | 0.0001      | 0.00                                      | 1.0000      |
| Other proctopexy (4876)                                                  | 0.1                | 0.1                    | 0.1                 | 0.1             | 0.01                                       | 0.0002      | 0.00                                      | 1.0000      |
| Other repair of rectum (4879)                                            | ---*               | ---*                   | ---*                | ---*            | 0.00                                       | 0.5425      | 0.00                                      | 1.0000      |
| Partial hepatectomy (5022)                                               | 0.3                | 0.2                    | 0.2                 | 0.1             | 0.06                                       | <.0001      | 0.00                                      | 1.0000      |
| Other destruction of lesion of liver (5029)                              | 0.1                | 0.0                    | 0.0                 | 0.0             | 0.02                                       | <.0001      | 0.00                                      | 1.0000      |
| Lobectomy of liver (503)                                                 | 0.1                | 0.1                    | 0.1                 | 0.0             | 0.04                                       | <.0001      | 0.00                                      | 1.0000      |
| Cholecystectomy (5122)                                                   | 0.8                | 0.8                    | 0.8                 | 0.9             | -0.02                                      | <.0001      | 0.00                                      | 1.0000      |
| Laparoscopic cholecystectomy (5123)                                      | 4.2                | 5.2                    | 5.2                 | 5.9             | -0.08                                      | <.0001      | 0.00                                      | 1.0000      |
| Laparoscopic partial cholecystectomy (5124)                              | 0.0                | ---*                   | ---*                | 0.0             | 0.00                                       | 0.3631      | 0.00                                      | 1.0000      |
| Anastomosis of gallbladder to intestine (5132)                           | ---*               | ---*                   | ---*                | ---*            | -0.01                                      | 0.1934      | 0.00                                      | 1.0000      |
| Choledochoenterostomy (5136)                                             | 0.0                | 0.0                    | 0.0                 | 0.0             | 0.00                                       | 0.8834      | 0.00                                      | 1.0000      |
| Anastomosis of hepatic duct to gastrointestinal tract (5137)             | 0.1                | 0.0                    | 0.0                 | 0.0             | 0.03                                       | <.0001      | 0.00                                      | 1.0000      |
| Common duct exploration for removal of calculus (5141)                   | 0.0                | ---*                   | ---*                | 0.0             | 0.00                                       | 0.8556      | 0.00                                      | 1.0000      |
| Exploration of common duct (5151)                                        | ---*               | ---*                   | ---*                | ---*            | 0.00                                       | 0.6995      | 0.00                                      | 1.0000      |
| Proximal pancreatectomy (5251)                                           | ---*               | ---*                   | ---*                | ---*            | 0.01                                       | 0.1689      | 0.00                                      | 1.0000      |
| Distal pancreatectomy (5252)                                             | 0.3                | 0.1                    | 0.1                 | 0.1             | 0.06                                       | <.0001      | 0.00                                      | 1.0000      |
| Radical subtotal pancreatectomy (5253)                                   | ---*               | ---*                   | ---*                | ---*            | 0.02                                       | <.0001      | 0.00                                      | 1.0000      |
| Other partial pancreatectomy (5259)                                      | 0.0                | ---*                   | ---*                | 0.0             | 0.01                                       | 0.0005      | 0.00                                      | 1.0000      |
| Total pancreatectomy (526)                                               | 0.1                | 0.0                    | 0.0                 | 0.0             | 0.02                                       | <.0001      | 0.00                                      | 1.0000      |
| Radical pancreaticoduodenectomy (527)                                    | 0.8                | 0.3                    | 0.3                 | 0.2             | 0.09                                       | <.0001      | 0.00                                      | 1.0000      |
| Unilateral repair of inguinal hernia, not otherwise specified (5300)     | 0.1                | 0.1                    | 0.1                 | 0.1             | -0.01                                      | 0.0003      | 0.00                                      | 1.0000      |

| Variable<br>(Percent unless noted)                                                                               | All Focal<br>Cases | Matched<br>Focal Cases | Matched<br>Controls | All<br>Controls | Standardized<br>Difference<br>before Match | P-<br>value | Standardized<br>Difference after<br>Match | P-<br>value |        |        |
|------------------------------------------------------------------------------------------------------------------|--------------------|------------------------|---------------------|-----------------|--------------------------------------------|-------------|-------------------------------------------|-------------|--------|--------|
| Other and open repair of direct inguinal hernia (5301)                                                           | 0.0                | ---                    | *                   | ---             | *                                          | 0.0         | -0.01                                     | 0.0457      | 0.00   | 1.0000 |
| Other and open repair of indirect inguinal hernia (5302)                                                         | 0.0                | 0.0                    | 0.0                 | 0.0             | 0.0                                        | -0.01       | 0.0413                                    | 0.00        | 1.0000 |        |
| Other and open repair of direct inguinal hernia with graft or prosthesis (5303)                                  | 0.1                | 0.1                    | 0.1                 | 0.2             | -0.01                                      | 0.0143      | 0.00                                      | 1.0000      |        |        |
| Other and open repair of indirect inguinal hernia with graft or prosthesis (5304)                                | 0.2                | 0.1                    | 0.1                 | 0.1             | 0.01                                       | 0.1231      | 0.00                                      | 1.0000      |        |        |
| Repair of inguinal hernia with graft or prosthesis, not otherwise specified (5305)                               | 0.2                | 0.2                    | 0.2                 | 0.3             | -0.02                                      | <.0001      | 0.00                                      | 1.0000      |        |        |
| Other and open bilateral repair of direct inguinal hernia with graft or prosthesis (5314)                        | ---                | *                      | ---                 | *               | ---                                        | *           | -0.01                                     | 0.0359      | 0.00   | 1.0000 |
| Other and open bilateral repair of indirect inguinal hernia with graft or prosthesis (5315)                      | 0.0                | ---                    | *                   | ---             | *                                          | 0.0         | 0.00                                      | 0.2275      | 0.00   | 1.0000 |
| Other and open bilateral repair of inguinal hernia, one direct and one indirect, with graft or prosthesis (5316) | ---                | *                      | ---                 | *               | ---                                        | *           | 0.01                                      | 0.1834      | 0.00   | 1.0000 |
| Bilateral inguinal hernia repair with graft or prosthesis, not otherwise specified (5317)                        | 0.0                | ---                    | *                   | ---             | *                                          | 0.0         | 0.00                                      | 0.5177      | 0.00   | 1.0000 |
| Unilateral repair of femoral hernia with graft or prosthesis (5321)                                              | 0.1                | 0.1                    | 0.1                 | 0.1             | -0.01                                      | 0.0425      | 0.00                                      | 1.0000      |        |        |
| Other unilateral femoral herniorrhaphy (5329)                                                                    | 0.1                | 0.1                    | 0.1                 | 0.1             | -0.01                                      | 0.2023      | 0.00                                      | 1.0000      |        |        |
| Other and open repair of umbilical hernia with graft or prosthesis (5341)                                        | 0.1                | 0.1                    | 0.1                 | 0.1             | 0.00                                       | 0.2723      | 0.00                                      | 1.0000      |        |        |
| Other open umbilical herniorrhaphy (5349)                                                                        | 0.1                | 0.1                    | 0.1                 | 0.1             | 0.00                                       | 0.3706      | 0.00                                      | 1.0000      |        |        |
| Incisional hernia repair (5351)                                                                                  | 0.2                | 0.2                    | 0.2                 | 0.2             | -0.01                                      | 0.0363      | 0.00                                      | 1.0000      |        |        |
| Repair of other hernia of anterior abdominal wall (5359)                                                         | 0.1                | 0.1                    | 0.1                 | 0.1             | -0.01                                      | 0.0351      | 0.00                                      | 1.0000      |        |        |
| Other open incisional hernia repair with graft or prosthesis (5361)                                              | 0.8                | 0.8                    | 0.8                 | 0.7             | 0.02                                       | <.0001      | 0.00                                      | 1.0000      |        |        |
| Other and open repair of other hernia of anterior abdominal wall with graft or prosthesis (5369)                 | 0.2                | 0.2                    | 0.2                 | 0.2             | 0.00                                       | 0.2604      | 0.00                                      | 1.0000      |        |        |
| Other and open repair of diaphragmatic hernia, abdominal approach (5372)                                         | 0.1                | 0.1                    | 0.1                 | 0.1             | 0.00                                       | 0.3627      | 0.00                                      | 1.0000      |        |        |
| Repair of diaphragmatic hernia, abdominal approach, not otherwise specified (5375)                               | ---                | *                      | ---                 | *               | ---                                        | *           | 0.00                                      | 0.4148      | 0.00   | 1.0000 |
| Laparoscopic lysis of peritoneal adhesions (5451)                                                                | 0.5                | 0.5                    | 0.5                 | 0.3             | 0.02                                       | <.0001      | 0.00                                      | 1.0000      |        |        |

| Variable<br>(Percent unless noted)                                            | All Focal<br>Cases | Matched<br>Focal Cases | Matched<br>Controls | All<br>Controls | Standardized<br>Difference<br>before Match | P-<br>value | Standardized<br>Difference after<br>Match | P-<br>value |
|-------------------------------------------------------------------------------|--------------------|------------------------|---------------------|-----------------|--------------------------------------------|-------------|-------------------------------------------|-------------|
| Other lysis of peritoneal adhesions (5459)                                    | 0.9                | 1.1                    | 1.1                 | 1.0             | -0.01                                      | 0.0097      | 0.00                                      | 1.0000      |
| Creation of cutaneoperitoneal fistula (5493)                                  | 0.1                | 0.1                    | 0.1                 | 0.1             | 0.00                                       | 0.7857      | 0.00                                      | 1.0000      |
| Repair of colovaginal fistula (7072)                                          | 0.0                | 0.0                    | 0.0                 | 0.0             | 0.01                                       | 0.1362      | 0.00                                      | 1.0000      |
| Repair of rectovaginal fistula (7073)                                         | 0.0                | ---                    | ---                 | 0.0             | 0.01                                       | 0.1561      | 0.00                                      | 1.0000      |
| Repair of other fistula of vagina (7075)                                      | ---                | ---                    | ---                 | ---             | 0.01                                       | 0.1531      | 0.00                                      | 1.0000      |
| Resection of quadrant of breast (8522)                                        | ---                | ---                    | ---                 | ---             | 0.01                                       | 0.1531      | 0.00                                      | 1.0000      |
| Subtotal mastectomy (8523)                                                    | 0.1                | 0.0                    | 0.0                 | 0.0             | 0.01                                       | 0.0009      | 0.00                                      | 1.0000      |
| Unilateral simple mastectomy (8541)                                           | 0.3                | 0.2                    | 0.2                 | 0.2             | 0.01                                       | 0.0025      | 0.00                                      | 1.0000      |
| Bilateral simple mastectomy (8542)                                            | 0.1                | 0.1                    | 0.1                 | 0.1             | 0.01                                       | 0.0018      | 0.00                                      | 1.0000      |
| Unilateral extended simple mastectomy (8543)                                  | 0.4                | 0.4                    | 0.4                 | 0.3             | 0.01                                       | 0.0240      | 0.00                                      | 1.0000      |
| Bilateral extended simple mastectomy (8544)                                   | 0.1                | 0.0                    | 0.0                 | 0.0             | 0.01                                       | 0.0551      | 0.00                                      | 1.0000      |
| Unilateral radical mastectomy (8545)                                          | 0.0                | ---                    | ---                 | 0.0             | 0.01                                       | 0.0273      | 0.00                                      | 1.0000      |
| Unilateral extended radical mastectomy (8547)                                 | ---                | ---                    | ---                 | ---             | 0.00                                       | 1.0000      | 0.00                                      | 1.0000      |
| Revision of hip replacement, both acetabular and femoral components (0070)    | 0.8                | 0.6                    | 0.6                 | 0.5             | 0.04                                       | <.0001      | 0.00                                      | 1.0000      |
| Revision of hip replacement, acetabular component (0071)                      | 0.2                | 0.1                    | 0.1                 | 0.1             | 0.01                                       | 0.0033      | 0.00                                      | 1.0000      |
| Revision of hip replacement, femoral component (0072)                         | 0.2                | 0.1                    | 0.1                 | 0.2             | -0.01                                      | 0.2245      | 0.00                                      | 1.0000      |
| Revision of hip replacement, acetabular liner and/or femoral head only (0073) | 0.2                | 0.1                    | 0.1                 | 0.1             | 0.02                                       | <.0001      | 0.00                                      | 1.0000      |
| Revision of knee replacement, total (all components) (0080)                   | 0.7                | 0.6                    | 0.6                 | 0.6             | 0.01                                       | 0.0084      | 0.00                                      | 1.0000      |
| Revision of knee replacement, tibial component (0081)                         | 0.2                | 0.2                    | 0.2                 | 0.2             | 0.00                                       | 0.7487      | 0.00                                      | 1.0000      |
| Revision of knee replacement, femoral component (0082)                        | 0.3                | 0.2                    | 0.2                 | 0.2             | 0.01                                       | 0.0008      | 0.00                                      | 1.0000      |
| Revision of knee replacement, patellar component (0083)                       | 0.1                | 0.1                    | 0.1                 | 0.1             | 0.00                                       | 0.4221      | 0.00                                      | 1.0000      |
| Revision of total knee replacement, tibial insert (liner) (0084)              | 0.2                | 0.2                    | 0.2                 | 0.2             | 0.01                                       | 0.0430      | 0.00                                      | 1.0000      |
| Reopening of laminectomy site (0302)                                          | 0.0                | ---                    | ---                 | 0.0             | 0.00                                       | 0.7766      | 0.00                                      | 1.0000      |
| Other exploration and decompression of spinal canal (0309)                    | 3.5                | 2.8                    | 2.8                 | 2.0             | 0.09                                       | <.0001      | 0.00                                      | 1.0000      |
| Excision or destruction of lesion of spinal cord or spinal meninges (034)     | 0.3                | 0.2                    | 0.2                 | 0.1             | 0.03                                       | <.0001      | 0.00                                      | 1.0000      |
| Repair of vertebral fracture (0353)                                           | 0.1                | 0.1                    | 0.1                 | 0.1             | 0.01                                       | 0.1285      | 0.00                                      | 1.0000      |

| Variable<br>(Percent unless noted)                                            | All Focal<br>Cases | Matched<br>Focal Cases | Matched<br>Controls | All<br>Controls | Standardized<br>Difference<br>before Match | P-<br>value | Standardized<br>Difference after<br>Match | P-<br>value |
|-------------------------------------------------------------------------------|--------------------|------------------------|---------------------|-----------------|--------------------------------------------|-------------|-------------------------------------------|-------------|
| Biopsy of bone, tibia and fibula (7747)                                       | 0.0                | ---                    | ---                 | 0.0             | 0.00                                       | 0.4324      | 0.00                                      | 1.0000      |
| Repair of hammer toe (7756)                                                   | 0.0                | ---                    | ---                 | 0.0             | 0.01                                       | 0.0358      | 0.00                                      | 1.0000      |
| Local excision of lesion or tissue of bone, humerus (7762)                    | ---                | ---                    | ---                 | ---             | 0.00                                       | 0.6732      | 0.00                                      | 1.0000      |
| Local excision of lesion or tissue of bone, radius and ulna (7763)            | ---                | ---                    | ---                 | ---             | 0.00                                       | 1.0000      | 0.00                                      | 1.0000      |
| Local excision of lesion or tissue of bone, femur (7765)                      | 0.0                | 0.0                    | 0.0                 | 0.0             | 0.01                                       | 0.0295      | 0.00                                      | 1.0000      |
| Local excision of lesion or tissue of bone, patella (7766)                    | ---                | ---                    | ---                 | ---             | 0.00                                       | 0.6130      | 0.00                                      | 1.0000      |
| Local excision of lesion or tissue of bone, tibia and fibula (7767)           | 0.1                | 0.0                    | 0.0                 | 0.0             | 0.01                                       | 0.1702      | 0.00                                      | 1.0000      |
| Other partial ostectomy, humerus (7782)                                       | ---                | ---                    | ---                 | ---             | 0.01                                       | 0.0010      | 0.00                                      | 1.0000      |
| Other partial ostectomy, radius and ulna (7783)                               | ---                | ---                    | ---                 | ---             | 0.00                                       | 0.5856      | 0.00                                      | 1.0000      |
| Other partial ostectomy, femur (7785)                                         | 0.0                | 0.0                    | 0.0                 | 0.0             | 0.01                                       | 0.0010      | 0.00                                      | 1.0000      |
| Other partial ostectomy, patella (7786)                                       | 0.0                | 0.0                    | 0.0                 | 0.0             | -0.01                                      | 0.0150      | 0.00                                      | 1.0000      |
| Other partial ostectomy, tibia and fibula (7787)                              | 0.0                | ---                    | ---                 | 0.0             | 0.01                                       | 0.0057      | 0.00                                      | 1.0000      |
| Total ostectomy, patella (7796)                                               | ---                | ---                    | ---                 | ---             | 0.01                                       | 0.0921      | 0.00                                      | 1.0000      |
| Total ostectomy, tibia and fibula (7797)                                      | ---                | ---                    | ---                 | ---             | 0.00                                       | 0.4992      | 0.00                                      | 1.0000      |
| Bone graft, humerus (7802)                                                    | ---                | ---                    | ---                 | ---             | 0.00                                       | 1.0000      | 0.00                                      | 1.0000      |
| Bone graft, femur (7805)                                                      | 0.0                | ---                    | ---                 | 0.0             | 0.01                                       | 0.0647      | 0.00                                      | 1.0000      |
| Bone graft, tibia and fibula (7807)                                           | ---                | ---                    | ---                 | ---             | 0.01                                       | 0.1218      | 0.00                                      | 1.0000      |
| Internal fixation of bone without fracture reduction, humerus (7852)          | 0.0                | 0.0                    | 0.0                 | 0.1             | -0.01                                      | 0.1315      | 0.00                                      | 1.0000      |
| Internal fixation of bone without fracture reduction, femur (7855)            | 1.1                | 1.3                    | 1.3                 | 1.4             | -0.03                                      | <.0001      | 0.00                                      | 1.0000      |
| Internal fixation of bone without fracture reduction, tibia and fibula (7857) | 0.0                | 0.0                    | 0.0                 | 0.0             | 0.00                                       | 0.2965      | 0.00                                      | 1.0000      |
| Removal of implanted devices from bone, humerus (7862)                        | 0.0                | 0.0                    | 0.0                 | 0.0             | 0.01                                       | 0.1234      | 0.00                                      | 1.0000      |
| Removal of implanted devices from bone, radius and ulna (7863)                | ---                | ---                    | ---                 | ---             | 0.00                                       | 0.3690      | 0.00                                      | 1.0000      |
| Removal of implanted devices from bone, femur (7865)                          | 0.1                | 0.1                    | 0.1                 | 0.1             | 0.00                                       | 0.9521      | 0.00                                      | 1.0000      |
| Removal of implanted devices from bone, patella (7866)                        | ---                | ---                    | ---                 | ---             | 0.00                                       | 0.3464      | 0.00                                      | 1.0000      |



| Variable<br>(Percent unless noted)                                             | All Focal<br>Cases | Matched<br>Focal Cases | Matched<br>Controls | All<br>Controls | Standardized<br>Difference<br>before Match | P-<br>value | Standardized<br>Difference after<br>Match | P-<br>value |
|--------------------------------------------------------------------------------|--------------------|------------------------|---------------------|-----------------|--------------------------------------------|-------------|-------------------------------------------|-------------|
| Removal of implanted devices from bone, tibia and fibula (7867)                | 0.1                | 0.0                    | 0.0                 | 0.1             | -0.01                                      | 0.2052      | 0.00                                      | 1.0000      |
| Removal of implanted devices from bone, other bones (7869)                     | 0.2                | 0.1                    | 0.1                 | 0.1             | 0.02                                       | <.0001      | 0.00                                      | 1.0000      |
| Open reduction of fracture without internal fixation, humerus (7921)           | ---*               | ---*                   | ---*                | ---*            | 0.00                                       | 0.7903      | 0.00                                      | 1.0000      |
| Open reduction of fracture without internal fixation, radius and ulna (7922)   | ---*               | ---*                   | ---*                | ---*            | 0.01                                       | 0.0949      | 0.00                                      | 1.0000      |
| Open reduction of fracture without internal fixation, femur (7925)             | 0.0                | ---*                   | ---*                | 0.0             | 0.00                                       | 0.6211      | 0.00                                      | 1.0000      |
| Open reduction of fracture without internal fixation, tibia and fibula (7926)  | 0.0                | ---*                   | ---*                | 0.0             | 0.00                                       | 0.7467      | 0.00                                      | 1.0000      |
| Open reduction of fracture with internal fixation, humerus (7931)              | 0.9                | 1.0                    | 1.0                 | 0.9             | 0.00                                       | 0.8339      | 0.00                                      | 1.0000      |
| Open reduction of fracture with internal fixation, radius and ulna (7932)      | 0.8                | 1.0                    | 1.0                 | 0.8             | 0.00                                       | 0.5440      | 0.00                                      | 1.0000      |
| Open reduction of fracture with internal fixation, femur (7935)                | 4.9                | 6.0                    | 6.0                 | 6.8             | -0.08                                      | <.0001      | 0.00                                      | 1.0000      |
| Open reduction of fracture with internal fixation, tibia and fibula (7936)     | 1.4                | 1.7                    | 1.7                 | 1.9             | -0.04                                      | <.0001      | 0.00                                      | 1.0000      |
| Open reduction of fracture with internal fixation, other specified bone (7939) | 0.2                | 0.1                    | 0.1                 | 0.1             | 0.02                                       | <.0001      | 0.00                                      | 1.0000      |
| Arthrotomy for removal of prosthesis without replacement, shoulder (8001)      | 0.0                | ---*                   | ---*                | 0.0             | 0.02                                       | 0.0001      | 0.00                                      | 1.0000      |
| Arthrotomy for removal of prosthesis without replacement, hip (8005)           | 0.1                | 0.1                    | 0.1                 | 0.1             | 0.02                                       | 0.0001      | 0.00                                      | 1.0000      |
| Arthrotomy for removal of prosthesis without replacement, knee (8006)          | 0.2                | 0.2                    | 0.2                 | 0.2             | 0.01                                       | 0.0424      | 0.00                                      | 1.0000      |
| Arthroscopy, shoulder (8021)                                                   | ---*               | ---*                   | ---*                | ---*            | -0.01                                      | 0.2000      | 0.00                                      | 1.0000      |
| Arthroscopy, knee (8026)                                                       | ---*               | ---*                   | ---*                | ---*            | 0.00                                       | 1.0000      | 0.00                                      | 1.0000      |
| Excision of intervertebral disc (8051)                                         | 1.2                | 1.2                    | 1.2                 | 0.9             | 0.03                                       | <.0001      | 0.00                                      | 1.0000      |
| Excision of semilunar cartilage of knee (806)                                  | 0.1                | 0.0                    | 0.0                 | 0.1             | 0.00                                       | 0.2546      | 0.00                                      | 1.0000      |
| Synovectomy, knee (8076)                                                       | 0.1                | 0.1                    | 0.1                 | 0.1             | -0.01                                      | 0.0166      | 0.00                                      | 1.0000      |
| Other local excision or destruction of lesion of joint, shoulder (8081)        | 0.1                | 0.0                    | 0.0                 | 0.1             | 0.00                                       | 0.8589      | 0.00                                      | 1.0000      |
| Other local excision or destruction of lesion of joint, hip (8085)             | 0.0                | ---*                   | ---*                | 0.0             | 0.00                                       | 0.4409      | 0.00                                      | 1.0000      |

| Variable<br>(Percent unless noted)                                                     | All Focal<br>Cases | Matched<br>Focal Cases | Matched<br>Controls | All<br>Controls | Standardized<br>Difference<br>before Match | P-<br>value | Standardized<br>Difference after<br>Match | P-<br>value |
|----------------------------------------------------------------------------------------|--------------------|------------------------|---------------------|-----------------|--------------------------------------------|-------------|-------------------------------------------|-------------|
| Other local excision or destruction of lesion of joint, knee (8086)                    | 0.1                | 0.0                    | 0.0                 | 0.0             | 0.00                                       | 0.5168      | 0.00                                      | 1.0000      |
| Atlas-axis spinal fusion (8101)                                                        | 0.2                | 0.1                    | 0.1                 | 0.1             | 0.03                                       | <.0001      | 0.00                                      | 1.0000      |
| Other cervical fusion of the anterior column, anterior technique (8102)                | 2.0                | 1.9                    | 1.9                 | 1.8             | 0.02                                       | <.0001      | 0.00                                      | 1.0000      |
| Other cervical fusion of the posterior column, posterior technique (8103)              | 0.9                | 0.7                    | 0.7                 | 0.4             | 0.06                                       | <.0001      | 0.00                                      | 1.0000      |
| Dorsal and dorsolumbar fusion of the anterior column, anterior technique (8104)        | 0.1                | 0.0                    | 0.0                 | 0.0             | 0.03                                       | <.0001      | 0.00                                      | 1.0000      |
| Dorsal and dorsolumbar fusion of the posterior column, posterior technique (8105)      | 0.7                | 0.4                    | 0.4                 | 0.2             | 0.07                                       | <.0001      | 0.00                                      | 1.0000      |
| Lumbar and lumbosacral fusion of the anterior column, anterior technique (8106)        | 1.6                | 1.0                    | 1.0                 | 0.7             | 0.09                                       | <.0001      | 0.00                                      | 1.0000      |
| Lumbar and lumbosacral fusion of the posterior column, posterior technique (8107)      | 3.2                | 3.3                    | 3.3                 | 3.0             | 0.01                                       | 0.0003      | 0.00                                      | 1.0000      |
| Lumbar and lumbosacral fusion of the anterior column, posterior technique (8108)       | 1.3                | 1.2                    | 1.2                 | 1.3             | 0.00                                       | 0.7500      | 0.00                                      | 1.0000      |
| Ankle fusion (8111)                                                                    | 0.1                | 0.1                    | 0.1                 | 0.1             | 0.02                                       | <.0001      | 0.00                                      | 1.0000      |
| Triple arthrodesis (8112)                                                              | 0.1                | 0.1                    | 0.1                 | 0.0             | 0.02                                       | <.0001      | 0.00                                      | 1.0000      |
| Subtalar fusion (8113)                                                                 | 0.0                | 0.0                    | 0.0                 | 0.0             | 0.01                                       | 0.0209      | 0.00                                      | 1.0000      |
| Tarsometatarsal fusion (8115)                                                          | ---                | ---                    | ---                 | ---             | 0.02                                       | <.0001      | 0.00                                      | 1.0000      |
| Metatarsophalangeal fusion (8116)                                                      | ---                | ---                    | ---                 | ---             | 0.01                                       | 0.0004      | 0.00                                      | 1.0000      |
| Arthrodesis of knee (8122)                                                             | ---                | ---                    | ---                 | ---             | 0.01                                       | 0.0094      | 0.00                                      | 1.0000      |
| Refusion of other cervical spine, anterior column, anterior technique (8132)           | 0.0                | ---                    | ---                 | 0.0             | 0.01                                       | 0.1864      | 0.00                                      | 1.0000      |
| Refusion of other cervical spine, posterior column, posterior technique (8133)         | 0.0                | 0.0                    | 0.0                 | 0.0             | 0.02                                       | <.0001      | 0.00                                      | 1.0000      |
| Refusion of dorsal and dorsolumbar spine, anterior column, anterior technique (8134)   | ---                | ---                    | ---                 | ---             | 0.00                                       | 0.3672      | 0.00                                      | 1.0000      |
| Refusion of dorsal and dorsolumbar spine, posterior column, posterior technique (8135) | 0.1                | 0.0                    | 0.0                 | 0.0             | 0.03                                       | <.0001      | 0.00                                      | 1.0000      |
| Refusion of lumbar and lumbosacral spine, anterior column, anterior technique (8136)   | 0.0                | ---                    | ---                 | 0.0             | 0.01                                       | 0.0094      | 0.00                                      | 1.0000      |
| Refusion of lumbar and lumbosacral spine, posterior column, posterior technique (8137) | 0.2                | 0.2                    | 0.2                 | 0.1             | 0.03                                       | <.0001      | 0.00                                      | 1.0000      |
| Refusion of lumbar and lumbosacral spine, anterior column, posterior technique (8138)  | 0.0                | 0.0                    | 0.0                 | 0.0             | 0.01                                       | 0.0020      | 0.00                                      | 1.0000      |

| Variable<br>(Percent unless noted)                                     | All Focal<br>Cases | Matched<br>Focal Cases | Matched<br>Controls | All<br>Controls | Standardized<br>Difference<br>before Match | P-<br>value | Standardized<br>Difference after<br>Match | P-<br>value |
|------------------------------------------------------------------------|--------------------|------------------------|---------------------|-----------------|--------------------------------------------|-------------|-------------------------------------------|-------------|
| Repair of hip, not elsewhere classified (8140)                         | ---                | ---                    | ---                 | ---             | -0.01                                      | 0.1573      | 0.00                                      | 1.0000      |
| Patellar stabilization (8144)                                          | ---                | ---                    | ---                 | ---             | -0.01                                      | 0.3116      | 0.00                                      | 1.0000      |
| Other repair of knee (8147)                                            | 0.0                | 0.0                    | 0.0                 | 0.0             | 0.00                                       | 0.4310      | 0.00                                      | 1.0000      |
| Total hip replacement (8151)                                           | 9.9                | 9.9                    | 9.9                 | 10.5            | -0.02                                      | <.0001      | 0.00                                      | 1.0000      |
| Partial hip replacement (8152)                                         | 4.2                | 5.2                    | 5.2                 | 6.0             | -0.08                                      | <.0001      | 0.00                                      | 1.0000      |
| Revision of hip replacement, not otherwise<br>specified (8153)         | 0.1                | 0.1                    | 0.1                 | 0.0             | 0.01                                       | 0.0829      | 0.00                                      | 1.0000      |
| Total knee replacement (8154)                                          | 17.2               | 18.7                   | 18.7                | 18.7            | -0.04                                      | <.0001      | 0.00                                      | 1.0000      |
| Revision of knee replacement, not otherwise<br>specified (8155)        | 0.1                | 0.1                    | 0.1                 | 0.1             | 0.00                                       | 0.8133      | 0.00                                      | 1.0000      |
| Total ankle replacement (8156)                                         | 0.2                | 0.1                    | 0.1                 | 0.1             | 0.03                                       | <.0001      | 0.00                                      | 1.0000      |
| Other total shoulder replacement (8180)                                | 1.4                | 1.1                    | 1.1                 | 1.0             | 0.04                                       | <.0001      | 0.00                                      | 1.0000      |
| Partial shoulder replacement (8181)                                    | 0.2                | 0.3                    | 0.3                 | 0.3             | -0.01                                      | 0.0995      | 0.00                                      | 1.0000      |
| Other repair of shoulder (8183)                                        | 0.0                | 0.0                    | 0.0                 | 0.0             | 0.00                                       | 1.0000      | 0.00                                      | 1.0000      |
| Total elbow replacement (8184)                                         | 0.1                | 0.1                    | 0.1                 | 0.1             | 0.02                                       | <.0001      | 0.00                                      | 1.0000      |
| Other repair of elbow (8185)                                           | 0.0                | ---                    | ---                 | 0.0             | 0.00                                       | 0.6109      | 0.00                                      | 1.0000      |
| Revision of joint replacement of upper extremity<br>(8197)             | 0.2                | 0.1                    | 0.1                 | 0.1             | 0.03                                       | <.0001      | 0.00                                      | 1.0000      |
| Bursectomy (835)                                                       | 0.1                | 0.1                    | 0.1                 | 0.1             | -0.02                                      | <.0001      | 0.00                                      | 1.0000      |
| Rotator cuff repair (8363)                                             | 0.1                | 0.1                    | 0.1                 | 0.1             | 0.00                                       | 0.4119      | 0.00                                      | 1.0000      |
| Other suture of tendon (8364)                                          | 0.0                | 0.1                    | 0.1                 | 0.1             | 0.00                                       | 0.2742      | 0.00                                      | 1.0000      |
| Percutaneous angioplasty of extracranial vessel(s)<br>(0061)           | 0.5                | 0.4                    | 0.4                 | 0.4             | 0.01                                       | 0.0066      | 0.00                                      | 1.0000      |
| Percutaneous insertion of carotid artery stent(s)<br>(0063)            | 0.1                | 0.0                    | 0.0                 | 0.1             | 0.00                                       | 0.4073      | 0.00                                      | 1.0000      |
| Percutaneous insertion of other extracranial artery<br>stent(s) (0064) | ---                | ---                    | ---                 | ---             | 0.00                                       | 0.5856      | 0.00                                      | 1.0000      |
| Incision of vessel, other vessels of head and neck<br>(3802)           | ---                | ---                    | ---                 | ---             | 0.00                                       | 0.5016      | 0.00                                      | 1.0000      |
| Incision of vessel, upper limb vessels (3803)                          | 0.1                | 0.1                    | 0.1                 | 0.1             | -0.01                                      | 0.0006      | 0.00                                      | 1.0000      |
| Incision of vessel, abdominal arteries (3806)                          | 0.0                | 0.0                    | 0.0                 | 0.0             | 0.00                                       | 0.7649      | 0.00                                      | 1.0000      |
| Incision of vessel, lower limb arteries (3808)                         | 0.2                | 0.2                    | 0.2                 | 0.3             | -0.02                                      | 0.0002      | 0.00                                      | 1.0000      |
| Endarterectomy, unspecified site (3810)                                | ---                | ---                    | ---                 | ---             | -0.01                                      | 0.3768      | 0.00                                      | 1.0000      |
| Endarterectomy, other vessels of head and neck<br>(3812)               | 3.0                | 3.6                    | 3.6                 | 3.9             | -0.05                                      | <.0001      | 0.00                                      | 1.0000      |
| Endarterectomy, upper limb vessels (3813)                              | ---                | ---                    | ---                 | ---             | -0.01                                      | 0.2200      | 0.00                                      | 1.0000      |
| Endarterectomy, aorta (3814)                                           | ---                | ---                    | ---                 | ---             | 0.00                                       | 0.5539      | 0.00                                      | 1.0000      |

| Variable<br>(Percent unless noted)                                             | All Focal<br>Cases | Matched<br>Focal Cases | Matched<br>Controls | All<br>Controls | Standardized<br>Difference<br>before Match | P-<br>value | Standardized<br>Difference after<br>Match | P-<br>value |
|--------------------------------------------------------------------------------|--------------------|------------------------|---------------------|-----------------|--------------------------------------------|-------------|-------------------------------------------|-------------|
| Endarterectomy, other thoracic vessels (3815)                                  | ---                | ---                    | ---                 | ---             | 0.03                                       | <.0001      | 0.00                                      | 1.0000      |
| Endarterectomy, abdominal arteries (3816)                                      | 0.1                | 0.0                    | 0.0                 | 0.0             | 0.02                                       | <.0001      | 0.00                                      | 1.0000      |
| Endarterectomy, lower limb arteries (3818)                                     | 0.6                | 0.7                    | 0.7                 | 0.6             | 0.00                                       | 0.8113      | 0.00                                      | 1.0000      |
| Resection of vessel with anastomosis, other vessels<br>of head and neck (3832) | ---                | ---                    | ---                 | ---             | 0.00                                       | 1.0000      | 0.00                                      | 1.0000      |
| Resection of vessel with anastomosis, upper limb<br>vessels (3833)             | ---                | ---                    | ---                 | ---             | 0.01                                       | 0.0494      | 0.00                                      | 1.0000      |
| Resection of vessel with anastomosis, aorta (3834)                             | 0.0                | ---                    | ---                 | 0.0             | 0.00                                       | 0.5852      | 0.00                                      | 1.0000      |
| Resection of vessel with anastomosis, abdominal<br>arteries (3836)             | ---                | ---                    | ---                 | ---             | 0.00                                       | 0.5856      | 0.00                                      | 1.0000      |
| Resection of vessel with anastomosis, lower limb<br>arteries (3838)            | ---                | ---                    | ---                 | ---             | -0.01                                      | 0.2575      | 0.00                                      | 1.0000      |
| Resection of vessel with replacement, other vessels<br>of head and neck (3842) | 0.0                | ---                    | ---                 | 0.0             | 0.01                                       | 0.0385      | 0.00                                      | 1.0000      |
| Resection of vessel with replacement, upper limb<br>vessels (3843)             | ---                | ---                    | ---                 | ---             | 0.01                                       | 0.1260      | 0.00                                      | 1.0000      |
| Resection of vessel with replacement, aorta,<br>abdominal (3844)               | 0.2                | 0.2                    | 0.2                 | 0.2             | 0.01                                       | 0.0007      | 0.00                                      | 1.0000      |
| Resection of vessel with replacement, abdominal<br>arteries (3846)             | ---                | ---                    | ---                 | ---             | 0.00                                       | 0.2158      | 0.00                                      | 1.0000      |
| Resection of vessel with replacement, abdominal<br>veins (3847)                | ---                | ---                    | ---                 | ---             | 0.00                                       | 0.2064      | 0.00                                      | 1.0000      |
| Resection of vessel with replacement, lower limb<br>arteries (3848)            | 0.0                | 0.0                    | 0.0                 | 0.0             | 0.00                                       | 0.2516      | 0.00                                      | 1.0000      |
| Other excision of vessels, upper limb vessels<br>(3863)                        | 0.0                | ---                    | ---                 | 0.0             | 0.00                                       | 0.6279      | 0.00                                      | 1.0000      |
| Other excision of vessels, aorta, abdominal (3864)                             | ---                | ---                    | ---                 | ---             | 0.00                                       | 1.0000      | 0.00                                      | 1.0000      |
| Other excision of vessels, lower limb arteries<br>(3868)                       | ---                | ---                    | ---                 | ---             | 0.00                                       | 1.0000      | 0.00                                      | 1.0000      |
| Intra-abdominal venous shunt (391)                                             | 0.1                | 0.1                    | 0.1                 | 0.0             | 0.03                                       | <.0001      | 0.00                                      | 1.0000      |
| Aorta-subclavian-carotid bypass (3922)                                         | 0.0                | 0.0                    | 0.0                 | 0.0             | 0.00                                       | 0.3077      | 0.00                                      | 1.0000      |
| Aorta-renal bypass (3924)                                                      | ---                | ---                    | ---                 | ---             | 0.01                                       | 0.1531      | 0.00                                      | 1.0000      |
| Aorta-iliac-femoral bypass (3925)                                              | 0.2                | 0.1                    | 0.1                 | 0.1             | 0.01                                       | 0.0321      | 0.00                                      | 1.0000      |
| Other intra-abdominal vascular shunt or bypass<br>(3926)                       | 0.0                | ---                    | ---                 | 0.0             | 0.02                                       | <.0001      | 0.00                                      | 1.0000      |
| Arteriovenostomy for renal dialysis (3927)                                     | 0.5                | 0.5                    | 0.5                 | 0.5             | 0.00                                       | 0.2299      | 0.00                                      | 1.0000      |
| Other (peripheral) vascular shunt or bypass (3929)                             | 1.1                | 1.2                    | 1.2                 | 1.2             | -0.01                                      | 0.0125      | 0.00                                      | 1.0000      |

| Variable<br>(Percent unless noted)                                             | All Focal<br>Cases | Matched<br>Focal Cases | Matched<br>Controls | All<br>Controls | Standardized<br>Difference<br>before Match | P-<br>value | Standardized<br>Difference after<br>Match | P-<br>value |
|--------------------------------------------------------------------------------|--------------------|------------------------|---------------------|-----------------|--------------------------------------------|-------------|-------------------------------------------|-------------|
| Revision of arteriovenous shunt for renal dialysis (3942)                      | 0.3                | 0.3                    | 0.3                 | 0.2             | 0.02                                       | <.0001      | 0.00                                      | 1.0000      |
| Removal of arteriovenous shunt for renal dialysis (3943)                       | 0.1                | 0.1                    | 0.1                 | 0.1             | 0.00                                       | 0.8089      | 0.00                                      | 1.0000      |
| Other revision of vascular procedure (3949)                                    | 0.3                | 0.3                    | 0.3                 | 0.3             | 0.01                                       | 0.0249      | 0.00                                      | 1.0000      |
| Repair of arteriovenous fistula (3953)                                         | 0.1                | 0.0                    | 0.0                 | 0.0             | 0.01                                       | 0.0090      | 0.00                                      | 1.0000      |
| Repair of blood vessel with tissue patch graft (3956)                          | 0.0                | ---*                   | ---*                | 0.0             | 0.01                                       | 0.0250      | 0.00                                      | 1.0000      |
| Repair of blood vessel with synthetic patch graft (3957)                       | ---*               | ---*                   | ---*                | ---*            | 0.01                                       | 0.1260      | 0.00                                      | 1.0000      |
| Repair of blood vessel with unspecified type of patch graft (3958)             | ---*               | ---*                   | ---*                | ---*            | -0.01                                      | 0.1934      | 0.00                                      | 1.0000      |
| Endovascular implantation of other graft in abdominal aorta (3971)             | 1.4                | 1.4                    | 1.4                 | 1.6             | -0.01                                      | 0.0010      | 0.00                                      | 1.0000      |
| Endovascular (total) embolization or occlusion of head and neck vessels (3972) | 0.3                | 0.2                    | 0.2                 | 0.1             | 0.04                                       | <.0001      | 0.00                                      | 1.0000      |
| Endovascular removal of obstruction from head and neck vessel(s) (3974)        | 0.4                | 0.4                    | 0.4                 | 0.2             | 0.03                                       | <.0001      | 0.00                                      | 1.0000      |
| Temporary (partial) therapeutic endovascular occlusion of vessel (3977)        | ---*               | ---*                   | ---*                | ---*            | 0.01                                       | 0.2052      | 0.00                                      | 1.0000      |
| Endovascular implantation of branching or fenestrated graft(s) in aorta (3978) | 0.3                | 0.2                    | 0.2                 | 0.2             | 0.03                                       | <.0001      | 0.00                                      | 1.0000      |
| Other endovascular procedures on other vessels (3979)                          | 0.8                | 0.8                    | 0.8                 | 0.7             | 0.01                                       | 0.0005      | 0.00                                      | 1.0000      |
| Other amputation below knee (8415)                                             | 0.5                | 0.6                    | 0.6                 | 0.5             | -0.01                                      | 0.1167      | 0.00                                      | 1.0000      |

Note. \*values are masked to comply with CMS cell size suppression rules. Among patient matches in the orthopedic surgical groups, the risk groups were so large that we were required to further divide the groups in order to accommodate the requirements of the matching algorithm. The additional division into more risk groups resulted in the loss of 67 pairs. P-values were calculated using group tests, with Fisher's exact test used for binary and Wilcoxon rank sum used for continuous variables.

**Appendix 8. Differences in 30-day Mortality after Post-Match Adjustment for Hospital Bed Size and Resident to Bed Ratio**

| Model                                             | Variable                 | Point Estimate (SE) | Odds Ratio (95% CI)  | Odds Ratio between 75th and 25th percentile | Chi Sq  | P-value |
|---------------------------------------------------|--------------------------|---------------------|----------------------|---------------------------------------------|---------|---------|
| <b>General, Orthopedic &amp; Vascular Surgery</b> |                          |                     |                      |                                             |         |         |
| Nursing resources                                 | Better nursing resources | -0.1633 (0.0356)    | 0.849 (0.792, 0.911) |                                             | 21.0545 | <.0001  |
| Nursing resources + Hospital Char.                | Better nursing resources | -0.1472 (0.0370)    | 0.863 (0.803, 0.928) |                                             | 15.8265 | <.0001  |
|                                                   | Number of beds           | -0.0250 (0.0322)    | 0.975 (0.916, 1.039) | 0.935 (0.789, 1.108)                        | 0.6016  | 0.4380  |
|                                                   | Resident to bed ratio    | -0.3436 (0.2374)    | 0.709 (0.445, 1.129) | 0.942 (0.869, 1.021)                        | 2.0943  | 0.1478  |
| <b>General Surgery</b>                            |                          |                     |                      |                                             |         |         |
| Nursing resources                                 | Better nursing resources | -0.1692 (0.0566)    | 0.844 (0.756, 0.943) |                                             | 8.9246  | 0.0028  |
| Nursing resources + Hospital Char.                | Better nursing resources | -0.1563 (0.0584)    | 0.855 (0.763, 0.959) |                                             | 7.1755  | 0.0074  |
|                                                   | Number of beds           | 0.0114 (0.0473)     | 1.012 (0.922, 1.110) | 1.031 (0.802, 1.326)                        | 0.0585  | 0.8088  |
|                                                   | Resident to bed ratio    | -0.5192 (0.3797)    | 0.595 (0.283, 1.252) | 0.909 (0.793, 1.042)                        | 1.8700  | 0.1715  |
| <b>Orthopedic Surgery</b>                         |                          |                     |                      |                                             |         |         |
| Nursing resources                                 | Better nursing resources | -0.2072 (0.0564)    | 0.813 (0.728, 0.908) |                                             | 13.4750 | 0.0002  |
| Nursing resources + Hospital Char.                | Better nursing resources | -0.1663 (0.0593)    | 0.847 (0.754, 0.951) |                                             | 7.8606  | 0.0051  |
|                                                   | Number of beds           | -0.0621 (0.0570)    | 0.940 (0.840, 1.051) | 0.848 (0.630, 1.141)                        | 1.1889  | 0.2756  |
|                                                   | Resident to bed ratio    | -1.0792 (0.4422)    | 0.340 (0.143, 0.808) | 0.856 (0.755, 0.970)                        | 5.9572  | 0.0147  |
| <b>Vascular Surgery</b>                           |                          |                     |                      |                                             |         |         |
| Nursing resources                                 | Better nursing resources | -0.0673 (0.0783)    | 0.935 (0.802, 1.090) |                                             | 0.7398  | 0.3897  |
| Nursing resources + Hospital Char.                | Better nursing resources | -0.0853 (0.0822)    | 0.918 (0.782, 1.079) |                                             | 1.0781  | 0.2991  |
|                                                   | Number of beds           | -0.0509 (0.0699)    | 0.950 (0.829, 1.090) | 0.877 (0.616, 1.249)                        | 0.5301  | 0.4666  |
|                                                   | Resident to bed ratio    | 0.7872 (0.4791)     | 2.197 (0.859, 5.620) | 1.163 (0.971, 1.392)                        | 2.6991  | 0.1004  |

Note. Coefficients for “number of beds” should be interpreted as the change in 30-day mortality for a 100-unit increase in number of beds.

**Appendix 9. Differences in Outcomes after Post-Match Adjustment for State**

| Model                                             | Variable                 | Point Estimate (SE) | Odds Ratio (95% CI)  | Chi Sq  | P-value |
|---------------------------------------------------|--------------------------|---------------------|----------------------|---------|---------|
| <b>General, Orthopedic &amp; Vascular Surgery</b> |                          |                     |                      |         |         |
| Nursing resources                                 | Better nursing resources | -0.1633 (0.0356)    | 0.849 (0.792, 0.911) | 21.0545 | <.0001  |
| Nursing resources + State                         | Better nursing resources | -0.1180 (0.0488)    | 0.889 (0.808, 0.978) | 5.8345  | 0.0157  |
|                                                   | State, CA                | --                  | --                   | --      | --      |
|                                                   | State, FL                | 0.1747 (0.0676)     | 1.191 (1.043, 1.360) | 6.6771  | 0.0098  |
|                                                   | State, NJ                | -0.2186 (0.1248)    | 0.804 (0.629, 1.026) | 3.0675  | 0.0799  |
|                                                   | State, PA                | 0.1011 (0.0867)     | 1.106 (0.934, 1.311) | 1.3620  | 0.2432  |
| <b>General Surgery</b>                            |                          |                     |                      |         |         |
| Nursing resources                                 | Better nursing resources | -0.1692 (0.0566)    | 0.844 (0.756, 0.943) | 8.9246  | 0.0028  |
| Nursing resources + State                         | Better nursing resources | -0.1459 (0.0788)    | 1.191 (1.043, 1.360) | 3.4236  | 0.0643  |
|                                                   | State, CA                | --                  | --                   | --      | --      |
|                                                   | State, FL                | 0.2132 (0.1057)     | 0.804 (0.629, 1.026) | 4.0689  | 0.0437  |
|                                                   | State, NJ                | -0.3678 (0.2047)    | 1.106 (0.934, 1.311) | 3.2277  | 0.0724  |
|                                                   | State, PA                | -0.0205 (0.1410)    | 1.106 (0.934, 1.311) | 0.0212  | 0.8843  |
| <b>Orthopedic Surgery</b>                         |                          |                     |                      |         |         |
| Nursing resources                                 | Better nursing resources | -0.2072 (0.0564)    | 0.813 (0.728, 0.908) | 13.4750 | 0.0002  |
| Nursing resources + State                         | Better nursing resources | -0.1021 (0.0763)    | 0.903 (0.778, 1.049) | 1.7896  | 0.1810  |
|                                                   | State, CA                | --                  | --                   | --      | --      |
|                                                   | State, FL                | 0.2130 (0.1097)     | 1.237 (0.998, 1.534) | 3.7736  | 0.0521  |
|                                                   | State, NJ                | -0.1596 (0.1953)    | 0.852 (0.581, 1.250) | 0.6682  | 0.4137  |
|                                                   | State, PA                | 0.3240 (0.1324)     | 1.383 (1.067, 1.792) | 5.9935  | 0.0144  |
| <b>Vascular Surgery</b>                           |                          |                     |                      |         |         |
| Nursing resources                                 | Better nursing resources | -0.0673 (0.0783)    | 0.935 (0.802, 1.090) | 0.7398  | 0.3897  |
| Nursing resources + State                         | Better nursing resources | -0.1201 (0.1099)    | 0.887 (0.715, 1.100) | 1.1944  | 0.2744  |
|                                                   | State, CA                | --                  | --                   | --      | --      |
|                                                   | State, FL                | -0.00465 (0.1493)   | 0.995 (0.743, 1.334) | 0.0010  | 0.9752  |
|                                                   | State, NJ                | -0.0821 (0.2704)    | 0.921 (0.542, 1.565) | 0.0921  | 0.7615  |
|                                                   | State, PA                | -0.1799 (0.2022)    | 0.835 (0.562, 1.242) | 0.7919  | 0.3735  |

**Appendix 10. 30-day Costs under Different Definitions**

(1) Intermediate Care Units are Costed as the average of General Unit and ICU Costs

(2) Intermediate Care Units are Costed as ICU Costs

| Outcome                                                      | Group          | All Patients | Patient Risk Quintiles of 30-Day Mortality |        |        |        |        |
|--------------------------------------------------------------|----------------|--------------|--------------------------------------------|--------|--------|--------|--------|
|                                                              |                |              | Q1                                         | Q2     | Q3     | Q4     | Q5     |
| <b>General, Orthopedic &amp; Vascular Surgery</b>            |                |              |                                            |        |        |        |        |
| Number of Pairs                                              |                | 62,715       | 12,762                                     | 12,567 | 12,741 | 12,596 | 12,049 |
| (1) Intermediate Care Unit = Average of General Unit and ICU | Better Nursing | 22,029       | 13,705                                     | 15,588 | 18,805 | 25,201 | 38,781 |
|                                                              | Worse Nursing  | 20,867       | 13,476                                     | 14,828 | 17,673 | 23,926 | 36,169 |
|                                                              | Difference     | 1,133        | 182                                        | 702    | 1,062  | 1,216  | 2,627  |
|                                                              | P-value        | <.0001       | 0.0128                                     | <.0001 | <.0001 | <.0001 | <.0001 |
| (2) Intermediate Care Unit = ICU                             | Better Nursing | 24,335       | 14,190                                     | 16,379 | 20,410 | 28,296 | 44,601 |
|                                                              | Worse Nursing  | 22,341       | 13,775                                     | 15,408 | 18,716 | 26,044 | 39,647 |
|                                                              | Diff           | 1,932        | 339                                        | 936    | 1,621  | 2,220  | 4,925  |
|                                                              | P-value        | <.0001       | <.0001                                     | <.0001 | <.0001 | <.0001 | <.0001 |
| <b>General Surgery</b>                                       |                |              |                                            |        |        |        |        |
| Number of Pairs                                              |                | 15,390       | 575                                        | 1,689  | 3,552  | 4,780  | 4,794  |
| (1) Intermediate Care Unit = Average of General Unit and ICU | Better Nursing | 30,573       | 13,244                                     | 15,122 | 19,480 | 27,649 | 49,849 |
|                                                              | Worse Nursing  | 28,568       | 12,229                                     | 14,432 | 18,399 | 26,520 | 45,589 |
|                                                              | Difference     | 2,008        | 899                                        | 665    | 1,010  | 1,077  | 4,260  |
|                                                              | P-value        | <.0001       | 0.0497                                     | 0.0672 | 0.001  | 0.0055 | <.0001 |
| (2) Intermediate Care Unit = ICU                             | Better Nursing | 34,788       | 14,003                                     | 16,392 | 21,698 | 31,358 | 57,384 |
|                                                              | Worse Nursing  | 31,113       | 13,071                                     | 15,618 | 19,825 | 29,077 | 49,884 |
|                                                              | Difference     | 3,570        | 848                                        | 791    | 1,806  | 2,257  | 7,531  |
|                                                              | P-value        | <.0001       | 0.1026                                     | 0.0745 | <.0001 | <.0001 | <.0001 |
| <b>Orthopedic Surgery</b>                                    |                |              |                                            |        |        |        |        |
| Number of Pairs                                              |                | 39,956       | 11,347                                     | 9,915  | 7,826  | 5,946  | 4,922  |
| (1) Intermediate Care Unit = Average of General Unit and ICU | Better Nursing | 17,771       | 13,653                                     | 15,684 | 18,076 | 22,142 | 26,573 |
|                                                              | Worse Nursing  | 17,120       | 13,586                                     | 14,934 | 17,248 | 21,113 | 25,584 |
|                                                              | Difference     | 618          | 40                                         | 687    | 773    | 954    | 1,044  |
|                                                              | P-value        | <.0001       | 0.5857                                     | <.0001 | <.0001 | 0.0008 | 0.0073 |
| (2) Intermediate Care Unit = ICU                             | Better Nursing | 19,046       | 14,069                                     | 16,325 | 19,200 | 24,375 | 30,353 |
|                                                              | Worse Nursing  | 17,948       | 13,823                                     | 15,329 | 18,051 | 22,652 | 28,050 |
|                                                              | Difference     | 1,039        | 180                                        | 913    | 1,120  | 1,634  | 2,327  |
|                                                              | P-value        | <.0001       | 0.0285                                     | <.0001 | <.0001 | <.0001 | <.0001 |
| <b>Vascular Surgery</b>                                      |                |              |                                            |        |        |        |        |
| Number of Pairs                                              |                | 7,369        | 840                                        | 963    | 1,363  | 1,870  | 2,333  |
| (1) Intermediate Care Unit = Average of General Unit and ICU | Better Nursing | 28,029       | 14,551                                     | 15,393 | 21,207 | 28,689 | 42,009 |
|                                                              | Worse Nursing  | 25,708       | 12,874                                     | 14,458 | 18,212 | 26,177 | 39,165 |
|                                                              | Difference     | 2,283        | 1,565                                      | 898    | 2,932  | 2,409  | 2,818  |
|                                                              | P-value        | <.0001       | 0.0002                                     | 0.0514 | <.0001 | 0.0004 | 0.0019 |
| (2) Intermediate Care Unit = ICU                             | Better Nursing | 32,166       | 15,997                                     | 16,971 | 24,114 | 33,075 | 48,842 |
|                                                              | Worse Nursing  | 28,303       | 13,678                                     | 15,729 | 19,822 | 28,941 | 43,428 |
|                                                              | Difference     | 3,814        | 2,185                                      | 1,287  | 4,194  | 3,985  | 5,388  |
|                                                              | P-value        | <.0001       | <.0001                                     | 0.0178 | <.0001 | <.0001 | <.0001 |



### Appendix 11. 30-day Mortality and Cost Differences Among Matched Patients in Top 15%, Middle 40%, and Bottom 45% of Hospitals

| <b>OVERALL</b>                              |                   |                     |                     |                |
|---------------------------------------------|-------------------|---------------------|---------------------|----------------|
| <b>Number of Patient Pairs</b><br>(n=62715) |                   |                     |                     |                |
| <b>30-day mortality</b>                     | <b>Odds Ratio</b> | <b>Lower 95% CI</b> | <b>Upper 95% CI</b> | <b>p-value</b> |
| Top 15% vs Bottom 45%                       | 0.8493            | 0.7921              | 0.9107              | <.0001         |
| Top 15% vs Middle 40%                       | 1.0449            | 0.9717              | 1.1236              | 0.2359         |
| Bottom 45% vs Middle 40%                    | 1.2279            | 1.1448              | 1.3172              | <.0001         |
| <b>Paired</b>                               |                   |                     |                     |                |
| <b>30-day nurse-adjusted cost, \$</b>       | <b>Difference</b> | <b>Lower 95% CI</b> | <b>Upper 95% CI</b> | <b>p-value</b> |
| Top 15% vs Bottom 45%                       | 840               | 694                 | 987                 | <.0001         |
| Top 15% vs Middle 40%                       | 1314              | 1169                | 1459                | <.0001         |
| Bottom 45% vs Middle 40%                    | 489               | 350                 | 629                 | <.0001         |
| <b>GENERAL SURGERY</b>                      |                   |                     |                     |                |
| <b>Number of Patient Pairs</b><br>(n=15390) |                   |                     |                     |                |
| <b>30-day mortality</b>                     | <b>Odds Ratio</b> | <b>Lower 95% CI</b> | <b>Upper 95% CI</b> | <b>p-value</b> |
| Top 15% vs Bottom 45%                       | 0.8443            | 0.7556              | 0.9435              | 0.0028         |
| Top 15% vs Middle 40%                       | 1.0506            | 0.9352              | 1.1804              | 0.4057         |
| Bottom 45% vs Middle 40%                    | 1.2389            | 1.1084              | 1.3846              | 0.0002         |
| <b>Paired</b>                               |                   |                     |                     |                |
| <b>30-day nurse-adjusted cost, \$</b>       | <b>Difference</b> | <b>Lower 95% CI</b> | <b>Upper 95% CI</b> | <b>p-value</b> |
| Top 15% vs Bottom 45%                       | 1300              | 868                 | 1732                | <.0001         |
| Top 15% vs Middle 40%                       | 2044              | 1608                | 2482                | <.0001         |
| Bottom 45% vs Middle 40%                    | 725               | 306                 | 1145                | <.0001         |
| <b>ORTHOPEDIC SURGERY</b>                   |                   |                     |                     |                |
| <b>Number of Patient Pairs</b><br>(n=39956) |                   |                     |                     |                |
| <b>30-day mortality</b>                     | <b>Odds Ratio</b> | <b>Lower 95% CI</b> | <b>Upper 95% CI</b> | <b>p-value</b> |
| Top 15% vs Bottom 45%                       | 0.8129            | 0.7277              | 0.9079              | 0.0002         |
| Top 15% vs Middle 40%                       | 1.0191            | 0.9084              | 1.1432              | 0.747          |
| Bottom 45% vs Middle 40%                    | 1.2513            | 1.1203              | 1.3977              | <.0001         |
| <b>Paired</b>                               |                   |                     |                     |                |
| <b>30-day nurse-adjusted cost, \$</b>       | <b>Difference</b> | <b>Lower 95% CI</b> | <b>Upper 95% CI</b> | <b>p-value</b> |
| Top 15% vs Bottom 45%                       | 579               | 450                 | 708                 | <.0001         |
| Top 15% vs Middle 40%                       | 958               | 831                 | 1084                | <.0001         |
| Bottom 45% vs Middle 40%                    | 392               | 271                 | 513                 | <.0001         |
| <b>VASCULAR SURGERY</b>                     |                   |                     |                     |                |
| <b>Number of Patient Pairs</b><br>(n=7369)  |                   |                     |                     |                |
| <b>30-day mortality</b>                     | <b>Odds Ratio</b> | <b>Lower 95% CI</b> | <b>Upper 95% CI</b> | <b>p-value</b> |
| Top 15% vs Bottom 45%                       | 0.9349            | 0.802               | 1.0899              | 0.3896         |
| Top 15% vs Middle 40%                       | 1.0842            | 0.926               | 1.2693              | 0.315          |
| Bottom 45% vs Middle 40%                    | 1.1615            | 0.993               | 1.3586              | 0.0609         |
| <b>Paired</b>                               |                   |                     |                     |                |
| <b>30-day nurse-adjusted cost, \$</b>       | <b>Difference</b> | <b>Lower 95% CI</b> | <b>Upper 95% CI</b> | <b>p-value</b> |
| Top 15% vs Bottom 45%                       | 1349              | 762                 | 1935                | <.0001         |
| Top 15% vs Middle 40%                       | 1815              | 1236                | 2396                | <.0001         |
| Bottom 45% vs Middle 40%                    | 541               | -12                 | 1094                | 0.0551         |

**Appendix 12. Differences in Hospital Coherence Percentiles among Matched Pairs: Middle Hospitals are Closer to Top Hospitals than to Bottom Hospitals**

| <b>Hospital Group Comparisons</b> | <b>Mean</b> | <b>Standard Deviation</b> |
|-----------------------------------|-------------|---------------------------|
| Top 15% - Bottom 45%              | 66.96       | 12.55                     |
| Middle 40% - Bottom 45%           | 40.86       | 16.12                     |
| Top 15% - Middle 40%              | 26.10       | 11.80                     |

The mean represents the average difference in the hospital coherence rank score among matched patient pairs. Larger differences represent greater differences in hospital nursing resources among the matched pairs. The greatest average difference in nursing resources is between matched pairs in the top 15% of hospitals and the bottom 45%. The mean difference in nursing resources was smaller between matched pairs in the top and middle categories of hospitals than the difference in the middle and bottom categories.

**Appendix 13. 30-day Mortality Differences Between Matched Patients in Better and Worse Nursing Resourced Hospitals for Common Procedures**

|                                                                                | <b>Odds Ratio<br/>(95% CI)</b> | <b>p-value</b> | <b>Rate of<br/>Mortality<br/>in Better<br/>Hospitals</b> | <b>Rate of<br/>Mortality<br/>in Worse<br/>Hospitals</b> |
|--------------------------------------------------------------------------------|--------------------------------|----------------|----------------------------------------------------------|---------------------------------------------------------|
| <b>GENERAL SURGERY</b>                                                         |                                |                |                                                          |                                                         |
| <b>Laparoscopic Cholecystectomy</b><br>(n=3250)                                | 0.98<br>(0.68 to 1.41)         | 0.926          | 0.018                                                    | 0.018                                                   |
| <b>Open and other right hemicolectomy</b><br>(n=939)                           | 0.84<br>(0.60 to 1.17)         | 0.311          | 0.079                                                    | 0.092                                                   |
| <b>All Other General Surgery Procedures</b><br>(n=11201)                       | 0.83<br>(0.73 to 0.94)         | 0.003          | 0.051                                                    | 0.059                                                   |
| <b>ORTHOPEDIC SURGERY</b>                                                      |                                |                |                                                          |                                                         |
| <b>Total Knee Replacement</b><br>(n=11,741)                                    | 1.40<br>(0.79 to 2.49)         | 0.248          | 0.002                                                    | 0.002                                                   |
| <b>Total Hip Replacement</b><br>(n=6,227)                                      | 0.61<br>(0.35 to 1.06)         | 0.074          | 0.003                                                    | 0.005                                                   |
| <b>All Other Orthopedic Procedures</b><br>(n=21,988)                           | 0.81<br>(0.72 to 0.90)         | 0.000          | 0.026                                                    | 0.032                                                   |
| <b>VASCULAR SURGERY</b>                                                        |                                |                |                                                          |                                                         |
| <b>Endarterectomy other vessels of head<br/>and neck</b> (n=2244)              | 0.85<br>(0.49 to 1.49)         | 0.572          | 0.010                                                    | 0.012                                                   |
| <b>Endovascular implantation of other<br/>graft in abdominal aorta</b> (n=909) | 0.33<br>(0.17 to 0.66)         | 0.001          | 0.013                                                    | 0.037                                                   |
| <b>All Other Vascular Procedures</b><br>(n=4216)                               | 1.01<br>(0.86 to 1.20)         | 0.866          | 0.081                                                    | 0.080                                                   |

**APPENDIX REFERENCES**

1. Silber JH, Rosenbaum PR, Kelz RR, et al. Medical and financial risks associated with surgery in the elderly obese. *Ann Surg* 2012;256:79-86.
2. Silber JH, Rosenbaum PR, Ross RN, et al. Template matching for auditing hospital cost and quality. *Health Serv Res* 2014;49:1446-74.
3. Silber JH, Rosenbaum PR, Ross RN, et al. A hospital-specific template for benchmarking its cost and quality." *Health Serv Res* 2014;49:1475-97.
4. Silber JH, Rosenbaum PR, McHugh MD, et al. Comparison of the value of nursing work environments in hospitals across different levels of patient risk. *JAMA Surg* 2016; 151:527-36.
5. Needleman J., Buerhaus PI, Stewart M, et al. Nurse staffing in hospitals: is there a business case for quality? *Health Aff (Millwood)* 2006; 25:204-11.
